# Supplementary material for: Differently Expression Analysis and Function Prediction of Long Non-coding RNAs in Duck Embryo Fibroblast Cells Infected by Duck Tembusu Virus
Source: Front Immunol. 2020 Aug 4;11:1729. doi: 10.3389/fimmu.2020.01729 (PMC7417515; doi:10.3389/fimmu.2020.01729)
Supplement: Supplementary file 1 [file Table_1.xlsx]

## Sheet: Sheet1
Table 1 the RT-qPCR primers used in the article
lncRNA ID		Forward Primer			Reverse Primer
MSTRG.2510.1		AGCCTTAAACTCCTGTACCA			GGGGTTCAATTTCCATGCTT
MSTRG.12011.3		AATCTGGCTGCTACACTCC			AGGCAAATCAATTCTGAGAGCATC
MSTRG.15748.1		CTCAGCAGGAAAAGAACAATAGCG			CCAGCACTTGAAGAGAATCCAG
MSTRG.11461.3		AGAACATCAGCCGCCTC			AGATACACTTAGCAGAGCACAC
MSTRG.7598.1		CCCCACAACAAAACCTCTAGCAA			TCATCCTTTCTGCCATCGTCT
MSTRG.13535.1		TTGGACACCTGCTATCCCT			TGCCCTATGTCTTCATTTAAGCC
MSTRG.8505.2		GCTCTTCCAGCATCAGAGACCT			GCAGAAACCCTTCCGAAACAATC
MSTRG.16234.1		CCCGTTCCTCACACAGATACTCA			CATCGCTTCATTGTTCGTGGT
MSTRG.20390.1		AGCCAATGTTCTAAAGTACCTG			TGAAGCAGCACCAAAGTCC
MSTRG.15097.7		AGAAATGTACTTAGGCAGTCCAGA			CTCAAATGCTCCTGTTCTAGTGT
MSTRG.12708.1		AAGGTCTGTTTGTGATTACCGTTC			TGGTCTCCGCTATCTTTAATTGTCA
gene		Forward Primer			Reverse Primer
GAPDH		GCCATCACAGCCACACAGAAGA			GGCAGGTCAGGTCAACAACAGA
SYBR TMUV NS5		AGACGACACGGCTGGATGG			GAGCTGGACGCACAGGTTC
