# Supplementary material for: Differently Expression Analysis and Function Prediction of Long Non-coding RNAs in Duck Embryo Fibroblast Cells Infected by Duck Tembusu Virus
Source: Front Immunol. 2020 Aug 4;11:1729. doi: 10.3389/fimmu.2020.01729 (PMC7417515; doi:10.3389/fimmu.2020.01729)
Supplement: Supplementary file 4 [file Table_4.xlsx]

## Sheet: Sheet1
Table 4 the differential expression of lncRNAs at 24 hpi
id	baseMean	baseMeanA	baseMeanB	foldChange	log2FoldChange	pval	padj
MSTRG.4517.1	1838.24	0	3676.48	Inf	Inf	7.34048e-12	1.16627e-08
MSTRG.7115.3	1200.92	0	2401.85	Inf	Inf	7.29304e-11	6.3647e-08
MSTRG.2885.1	3357.94	2.50485	6713.37	2680.15	11.3881	1.82766e-10	1.19146e-07
MSTRG.3850.3	871.193	0	1742.39	Inf	Inf	4.81869e-10	2.60627e-07
MSTRG.18019.1	772.018	0	1544.04	Inf	Inf	1.031e-09	4.89347e-07
MSTRG.1721.2	912.817	0.250485	1825.38	7287.4	12.8312	1.46512e-09	6.49795e-07
MSTRG.4517.4	710.732	0	1421.46	Inf	Inf	1.70124e-09	7.19148e-07
MSTRG.247.2	661.342	0	1322.68	Inf	Inf	2.68309e-09	1.05968e-06
MSTRG.11592.2	582.99	0	1165.98	Inf	Inf	6.06067e-09	2.02426e-06
MSTRG.8789.17	579.685	0	1159.37	Inf	Inf	6.32165e-09	2.06936e-06
MSTRG.8472.5	579.266	0	1158.53	Inf	Inf	6.35173e-09	2.06936e-06
MSTRG.5169.3	3091.54	7.50672	6175.56	822.672	9.68417	6.94926e-09	2.23816e-06
MSTRG.5641.3	543.335	0	1086.67	Inf	Inf	9.57652e-09	2.94413e-06
MSTRG.19527.1	24686.2	92.3786	49280.1	533.458	9.05923	1.14349e-08	3.38099e-06
MSTRG.6706.1	498.989	0	997.977	Inf	Inf	1.69423e-08	4.67711e-06
MSTRG.8789.4	926.979	1.21331	1852.75	1527.01	10.5765	1.89647e-08	5.07991e-06
MSTRG.887.2	587.299	0.242662	1174.35	4839.46	12.2406	2.17128e-08	5.631e-06
MSTRG.4039.7	6068.17	24.6555	12111.7	491.237	8.94028	2.25446e-08	5.78126e-06
MSTRG.4345.9	436.294	0	872.588	Inf	Inf	4.12486e-08	9.29951e-06
MSTRG.4039.8	434.547	0	869.093	Inf	Inf	4.27564e-08	9.41091e-06
MSTRG.7074.3	435.019	0	870.038	Inf	Inf	4.27813e-08	9.41091e-06
MSTRG.12011.4	737.454	1.25242	1473.66	1176.64	10.2005	6.9144e-08	1.38157e-05
MSTRG.8789.2	1918.98	7.99824	3829.96	478.851	8.90343	7.10262e-08	1.40259e-05
MSTRG.7115.2	397.078	0	794.157	Inf	Inf	7.91856e-08	1.54678e-05
MSTRG.8136.2	22298.6	153.86	44443.4	288.856	8.17421	1.01083e-07	1.90572e-05
MSTRG.3850.1	3020.01	17.8474	6022.17	337.425	8.39843	1.31342e-07	2.35695e-05
MSTRG.5169.5	360.057	0	720.114	Inf	Inf	1.48805e-07	2.56418e-05
MSTRG.9848.1	350.147	0	700.294	Inf	Inf	1.82761e-07	3.01578e-05
MSTRG.3850.2	331.242	0	662.484	Inf	Inf	2.69171e-07	4.10262e-05
MSTRG.1627.3	1877.65	11.8355	3743.46	316.29	8.3051	2.78852e-07	4.22035e-05
MSTRG.17169.1	324.827	0	649.655	Inf	Inf	3.01904e-07	4.47546e-05
MSTRG.1627.5	320.502	0	641.004	Inf	Inf	3.33547e-07	4.87773e-05
MSTRG.11461.1	317.15	0	634.3	Inf	Inf	3.58518e-07	5.18681e-05
MSTRG.66.21	315.761	0	631.522	Inf	Inf	3.63014e-07	5.23786e-05
MSTRG.8671.2	473.771	0.747136	946.796	1267.23	10.3075	3.7268e-07	5.33465e-05
MSTRG.4945.1	2474.08	19.7424	4928.41	249.636	7.96368	4.2755e-07	5.94701e-05
MSTRG.20269.1	1097.48	6.18659	2188.77	353.793	8.46676	4.836e-07	6.62286e-05
MSTRG.1627.2	769.708	3.23121	1536.19	475.421	8.89306	5.14614e-07	6.85831e-05
MSTRG.2885.2	299.253	0	598.506	Inf	Inf	5.34951e-07	7.00137e-05
MSTRG.11320.2	280.721	0	561.443	Inf	Inf	8.22309e-07	9.82197e-05
MSTRG.15464.1	2928.7	29.8962	5827.5	194.924	7.60677	8.24651e-07	9.82824e-05
MSTRG.6706.5	701.364	3.49383	1399.23	400.487	8.64561	1.01899e-06	0.000118064
MSTRG.727.1	266.182	0	532.364	Inf	Inf	1.17894e-06	0.000133174
MSTRG.3850.4	364.579	0	729.158	Inf	Inf	1.31254e-06	0.000144347
MSTRG.19414.3	258.967	0	517.935	Inf	Inf	1.42802e-06	0.000153613
MSTRG.6706.3	249.693	0	499.385	Inf	Inf	1.82964e-06	0.000186789
MSTRG.4039.2	2131.41	25.5498	4237.27	165.844	7.37368	1.84782e-06	0.00018829
MSTRG.12593.2	243.11	0	486.221	Inf	Inf	2.15607e-06	0.00021413
MSTRG.20246.9	992.996	9.34408	1976.65	211.54	7.72479	2.58134e-06	0.000248968
MSTRG.4039.9	2492.7	35.5357	4949.86	139.292	7.12197	2.71802e-06	0.000259377
MSTRG.20510.1	650.211	4.50297	1295.92	287.792	8.16888	2.90309e-06	0.000272812
MSTRG.6606.1	334.555	0.751454	668.358	889.42	9.79672	3.25166e-06	0.000298711
MSTRG.2885.6	487.077	2.45854	971.696	395.233	8.62656	3.45933e-06	0.00031353
MSTRG.4039.4	1367.03	16.7437	2717.32	162.289	7.34242	3.58907e-06	0.000322587
MSTRG.12670.10	1282.82	15.9471	2549.7	159.885	7.32089	3.73424e-06	0.000332323
MSTRG.4039.5	223.375	0	446.75	Inf	Inf	3.83956e-06	0.000340221
MSTRG.12593.1	264.235	0.250485	528.219	2108.79	11.0422	3.86728e-06	0.000341355
MSTRG.13547.1	709.053	5.97872	1412.13	236.192	7.88382	3.89221e-06	0.000342578
MSTRG.247.1	975.656	10.6533	1940.66	182.165	7.5091	4.07668e-06	0.000354499
MSTRG.819.1	408.344	816.688	0	0	-Inf	4.08913e-06	0.000354575
MSTRG.7115.1	1503.77	20.7814	2986.76	143.723	7.16715	4.2076e-06	0.000363102
MSTRG.7785.1	669.681	5.71484	1333.65	233.366	7.86645	4.59495e-06	0.000386305
MSTRG.20390.1	419.787	1.96683	837.607	425.866	8.73426	4.95876e-06	0.000410258
MSTRG.1451.3	210.036	0	420.072	Inf	Inf	5.85942e-06	0.000468136
MSTRG.17169.2	791.214	8.92609	1573.5	176.281	7.46174	6.78044e-06	0.000525611
MSTRG.8472.2	443.176	0	886.351	Inf	Inf	7.54919e-06	0.000571289
MSTRG.16804.4	7831.69	179.518	15483.9	86.2523	6.43049	8.00913e-06	0.000597789
MSTRG.11461.2	199.845	0	399.691	Inf	Inf	8.02196e-06	0.000597789
MSTRG.12670.5	805.904	9.92884	1601.88	161.336	7.33392	8.29103e-06	0.000612857
MSTRG.1627.9	799.228	9.96182	1588.49	159.458	7.31703	8.59774e-06	0.000632074
MSTRG.5169.7	197.215	0	394.43	Inf	Inf	8.6894e-06	0.000636219
MSTRG.12527.1	192.876	0	385.752	Inf	Inf	1.01035e-05	0.000724079
MSTRG.12218.1	298.316	0.983416	595.648	605.693	9.24244	1.04249e-05	0.000741223
MSTRG.13346.18	224.112	448.223	0	0	-Inf	1.0959e-05	0.000774111
MSTRG.19461.1	726.977	9.073	1444.88	159.251	7.31516	1.10199e-05	0.000776389
MSTRG.2203.1	409.124	2.74957	815.499	296.591	8.21233	1.13192e-05	0.000790268
MSTRG.1741.2	292.076	1.00194	583.151	582.022	9.18493	1.17559e-05	0.000813413
MSTRG.1451.1	186.13	0	372.259	Inf	Inf	1.28384e-05	0.000877093
MSTRG.2510.1	2077.28	45.9059	4108.65	89.5017	6.48384	1.33966e-05	0.000910614
MSTRG.8789.16	184.226	0	368.451	Inf	Inf	1.35984e-05	0.00092088
MSTRG.1627.6	295.602	0	591.204	Inf	Inf	1.47617e-05	0.000986078
MSTRG.11736.1	428.563	3.46398	853.663	246.44	7.94509	1.49597e-05	0.00099685
MSTRG.8789.15	181.556	0	363.111	Inf	Inf	1.5211e-05	0.00101095
MSTRG.12835.2	3812.62	103.855	7521.39	72.4221	6.17836	1.79364e-05	0.00115812
MSTRG.4020.2	287.162	1.2446	573.08	460.452	8.84691	1.89587e-05	0.00121058
MSTRG.860.1	1774.51	44.0919	3504.92	79.4912	6.31272	2.22203e-05	0.00138354
MSTRG.20509.1	262.359	0.996182	523.722	525.729	9.03818	2.2696e-05	0.00141154
MSTRG.11377.1	1041.33	21.7332	2060.93	94.829	6.56726	2.39142e-05	0.00146957
MSTRG.11461.5	257.102	1.00194	513.201	512.208	9.00059	2.56416e-05	0.00155018
MSTRG.4425.1	369.822	3.19228	736.452	230.698	7.84986	2.84642e-05	0.00169246
MSTRG.13683.10	186.732	0	373.463	Inf	Inf	2.87486e-05	0.00170003
MSTRG.11405.1	280.264	1.47512	559.053	378.987	8.566	3.00535e-05	0.00175989
MSTRG.8510.2	161.457	0	322.914	Inf	Inf	3.19876e-05	0.00185111
MSTRG.17170.1	607.063	10.1213	1204.01	118.958	6.89431	3.51415e-05	0.00200149
MSTRG.4345.13	844.549	17.9843	1671.11	92.9209	6.53793	3.66634e-05	0.00207944
MSTRG.16234.1	484.393	7.1879	961.598	133.78	7.06372	4.39876e-05	0.00242618
MSTRG.8671.1	151.114	0	302.229	Inf	Inf	4.85177e-05	0.00264904
MSTRG.18008.1	214.736	0.747136	428.725	573.824	9.16446	4.95327e-05	0.00269629
MSTRG.1627.1	651.5	13.1994	1289.8	97.7166	6.61053	4.98435e-05	0.00271048
MSTRG.8789.3	149.42	0	298.841	Inf	Inf	5.168e-05	0.00279351
MSTRG.2226.1	149.031	0	298.062	Inf	Inf	5.27388e-05	0.00284222
MSTRG.6720.2	146.812	0	293.624	Inf	Inf	5.7779e-05	0.00307405
MSTRG.2226.2	146.304	0	292.608	Inf	Inf	5.89472e-05	0.00312359
MSTRG.4345.10	146.408	0	292.817	Inf	Inf	5.89989e-05	0.00312359
MSTRG.5641.4	661.978	14.4446	1309.51	90.6573	6.50235	5.94316e-05	0.00313937
MSTRG.16031.1	414.182	5.9886	822.375	137.323	7.10143	6.21333e-05	0.00324822
MSTRG.11461.6	144.832	0	289.665	Inf	Inf	6.25285e-05	0.00326258
MSTRG.20541.2	138.811	0	277.623	Inf	Inf	8.09675e-05	0.00403778
MSTRG.1721.3	178.122	0	356.245	Inf	Inf	8.34065e-05	0.00412142
MSTRG.11461.3	464.689	8.91269	920.465	103.276	6.69036	9.29198e-05	0.00449303
MSTRG.12670.8	133.474	0	266.949	Inf	Inf	0.000104094	0.00494495
MSTRG.12670.7	132.173	0	264.347	Inf	Inf	0.000110349	0.00517651
MSTRG.66.23	1067.45	38.0737	2096.82	55.0727	5.78326	0.000113078	0.0052898
MSTRG.5169.8	130.692	0	261.384	Inf	Inf	0.00011675	0.00540387
MSTRG.1721.4	258.508	2.49765	514.518	206.001	7.68651	0.000120894	0.00556707
MSTRG.14573.4	149.741	299.482	0	0	-Inf	0.00012484	0.0057003
MSTRG.8789.7	128.563	0	257.125	Inf	Inf	0.000129221	0.00584605
MSTRG.1627.8	900.396	31.1074	1769.68	56.8895	5.83009	0.000132855	0.00598544
MSTRG.10924.6	743.006	23.3036	1462.71	62.7675	5.97195	0.000133299	0.00600044
MSTRG.252.1	124.348	0	248.695	Inf	Inf	0.000159262	0.00697195
MSTRG.8789.9	123.928	0	247.855	Inf	Inf	0.00016124	0.00705285
MSTRG.11377.2	348.525	6.06656	690.984	113.9	6.83163	0.000162607	0.0071055
MSTRG.8389.1	280.423	3.71528	557.13	149.956	7.2284	0.000168603	0.00733932
MSTRG.1741.1	206.091	1.45597	410.727	282.097	8.14005	0.00017442	0.00756209
MSTRG.6836.2	717.307	0	1434.61	Inf	Inf	0.000183313	0.00786575
MSTRG.12011.3	400.041	8.73585	791.346	90.5861	6.50122	0.000190417	0.00811312
MSTRG.8789.11	119.861	0	239.722	Inf	Inf	0.000194311	0.00822676
MSTRG.15748.1	428.65	10.3623	846.937	81.7326	6.35284	0.000200153	0.00844107
MSTRG.12670.4	119.529	0	239.058	Inf	Inf	0.000201665	0.00848092
MSTRG.8174.1	154.237	0.485325	307.988	634.602	9.30971	0.000211273	0.00878674
MSTRG.20269.2	116.957	0	233.915	Inf	Inf	0.000225062	0.00928173
MSTRG.11693.1	263.964	3.71096	524.217	141.262	7.14223	0.000231819	0.0095241
MSTRG.2740.1	266.116	3.96495	528.267	133.234	7.05782	0.000253325	0.010191
MSTRG.8472.3	114.267	0	228.534	Inf	Inf	0.000259557	0.0103723
MSTRG.8789.1	113.912	0	227.825	Inf	Inf	0.000260408	0.010391
MSTRG.4517.5	628.367	23.2953	1233.44	52.9481	5.72651	0.000278431	0.0109966
MSTRG.16235.1	112.216	0	224.433	Inf	Inf	0.000284734	0.0111802
MSTRG.7598.1	1242.64	62.9288	2422.35	38.4935	5.26654	0.000288679	0.0113187
MSTRG.12593.3	933.959	42.7378	1825.18	42.7065	5.41638	0.000292748	0.0114601
MSTRG.10924.3	309.858	6.13759	613.579	99.9707	6.64343	0.000294624	0.0115058
MSTRG.11691.1	526.82	18.5591	1035.08	55.772	5.80147	0.000331638	0.0126994
MSTRG.6720.1	414.76	12.3526	817.168	66.1536	6.04775	0.000357699	0.013493
MSTRG.5537.14	661.517	28.6182	1294.42	45.2306	5.49923	0.000394225	0.0146101
MSTRG.2226.3	218.21	3.0015	433.418	144.401	7.17393	0.000408472	0.0150351
MSTRG.4039.1	891.018	45.6335	1736.4	38.0511	5.24986	0.000421263	0.0154324
MSTRG.1811.1	882.689	46.641	1718.74	36.8503	5.20361	0.000463624	0.0167238
MSTRG.7275.1	102.21	0	204.419	Inf	Inf	0.000478879	0.0171597
MSTRG.12670.2	837.243	43.5669	1630.92	37.4349	5.22631	0.0004812	0.0172201
MSTRG.8136.1	1349.64	0	2699.27	Inf	Inf	0.000486082	0.0173718
MSTRG.16235.2	101.329	0	202.658	Inf	Inf	0.000501747	0.0178257
MSTRG.4039.6	356.676	10.4345	702.917	67.3648	6.07392	0.000508677	0.0180601
MSTRG.11732.2	205.835	2.98855	408.681	136.749	7.09539	0.000547811	0.0191851
MSTRG.1365.1	221.099	3.69738	438.501	118.598	6.88993	0.000572341	0.0198769
MSTRG.8789.13	116.921	0	233.842	Inf	Inf	0.000580093	0.0201074
MSTRG.2586.1	96.743	0	193.486	Inf	Inf	0.000650814	0.0221056
MSTRG.8505.2	9387.6	798.541	17976.7	22.5119	4.49262	0.000673426	0.022728
MSTRG.11692.1	275.21	7.12676	543.293	76.2328	6.25234	0.000713586	0.023781
MSTRG.8324.2	94.8019	0	189.604	Inf	Inf	0.000718493	0.0238651
MSTRG.2730.1	317.209	9.89117	624.526	63.1398	5.98048	0.000733982	0.0242308
MSTRG.2885.7	94.0688	0	188.138	Inf	Inf	0.00074091	0.0243851
MSTRG.16250.1	228.198	4.71785	451.677	95.738	6.58102	0.000757103	0.0247824
MSTRG.8471.1	205.697	3.67823	407.716	110.845	6.79241	0.000811241	0.0261745
MSTRG.15112.1	126.137	251.843	0.431099	0.00171177	-9.19029	0.000815892	0.0263089
MSTRG.19824.1	138.914	0.984855	276.842	281.1	8.13494	0.000821711	0.0264178
MSTRG.16200.1	358.45	13.3757	703.524	52.5971	5.71691	0.000826436	0.0265067
MSTRG.1627.4	779.327	48.1521	1510.5	31.3694	4.97129	0.000857021	0.0272134
MSTRG.9027.1	1187.91	85.9251	2289.9	26.6499	4.73606	0.000890733	0.0280045
MSTRG.2042.1	562.456	30.1461	1094.77	36.3154	5.18251	0.000896246	0.0281451
MSTRG.10924.7	127.142	0.751454	253.533	337.39	8.39828	0.00092956	0.0289227
MSTRG.20207.1	141.513	1.22896	281.796	229.297	7.84108	0.000982814	0.0302836
MSTRG.1484.1	838.234	1655.24	21.2252	0.012823	-6.28512	0.00100462	0.0308295
MSTRG.5169.4	798.08	53.1045	1543.06	29.057	4.86081	0.00102954	0.0314371
MSTRG.8510.3	86.3483	0	172.697	Inf	Inf	0.00117305	0.034798
MSTRG.16235.3	171.034	2.75245	339.315	123.277	6.94576	0.0011932	0.0353183
MSTRG.9856.1	85.8515	0	171.703	Inf	Inf	0.0012009	0.0354469
MSTRG.8324.3	272.817	8.97851	536.656	59.7711	5.90138	0.00123201	0.0361309
MSTRG.8435.2	110.71	0.493147	220.928	447.995	8.80734	0.00126046	0.0368256
MSTRG.19591.1	84.3854	0	168.771	Inf	Inf	0.00131057	0.0380991
MSTRG.11782.1	226.066	6.20511	445.926	71.8643	6.1672	0.0013276	0.0384962
MSTRG.837.2	84.1346	0	168.269	Inf	Inf	0.00132926	0.0385237
MSTRG.13258.1	306.835	12.4664	601.204	48.2259	5.59173	0.0013863	0.039793
MSTRG.12011.2	82.7213	0	165.443	Inf	Inf	0.001449	0.0412644
MSTRG.15263.1	325.555	14.3003	636.81	44.5313	5.47675	0.00148515	0.0421818
MSTRG.8510.4	81.9686	0	163.937	Inf	Inf	0.0015127	0.0427412
MSTRG.12834.1	529.721	34.1648	1025.28	30.0098	4.90736	0.00157992	0.0443164
MSTRG.3977.2	291.383	12.0118	570.754	47.5163	5.57035	0.00160108	0.0447476
MSTRG.5290.1	155.573	2.47769	308.668	124.579	6.96092	0.00162283	0.0451999
MSTRG.12669.1	344.993	17.1809	672.804	39.1599	5.29131	0.00170868	0.0471459
MSTRG.16028.1	1097.24	97.8548	2096.62	21.4258	4.42128	0.00176783	0.0484568
MSTRG.12670.1	245.236	8.9448	481.527	53.8332	5.75043	0.00185971	0.050464
MSTRG.8324.1	290.267	12.8848	567.648	44.0555	5.46125	0.00192108	0.051895
MSTRG.8789.12	76.9437	0	153.887	Inf	Inf	0.00207266	0.0550552
MSTRG.813.1	849.487	76.1203	1622.85	21.3196	4.41411	0.00220998	0.0581281
MSTRG.6927.1	304.181	15.0995	593.263	39.2903	5.2961	0.00223456	0.0585509
MSTRG.11697.2	220.046	7.69463	432.398	56.1948	5.81237	0.00224999	0.0588411
MSTRG.8935.1	327.211	17.5152	636.907	36.3631	5.1844	0.00228403	0.0595299
MSTRG.12067.1	156.366	3.21719	309.516	96.2068	6.58807	0.00234306	0.0607468
MSTRG.12011.1	392.955	12.9921	772.918	59.4914	5.89461	0.00235266	0.0609081
MSTRG.8789.10	74.4969	0	148.994	Inf	Inf	0.00240126	0.0617232
MSTRG.12097.1	188.207	5.38551	371.028	68.8937	6.1063	0.00241157	0.0619293
MSTRG.4345.12	73.2395	0	146.479	Inf	Inf	0.00260248	0.0657299
MSTRG.6990.1	305.466	16.304	594.628	36.4714	5.18869	0.0026033	0.0657299
MSTRG.12670.3	73.0474	0	146.095	Inf	Inf	0.0026238	0.0660805
MSTRG.2461.1	72.5899	0	145.18	Inf	Inf	0.00271243	0.0678529
MSTRG.9926.1	357.504	22.5509	692.457	30.7065	4.94047	0.00279919	0.0696041
MSTRG.20466.1	113.545	1.24523	225.846	181.369	7.50278	0.00284235	0.0704507
MSTRG.8510.1	159.263	3.99067	314.535	78.8176	6.30045	0.00297993	0.0732236
MSTRG.1107.1	144.409	2.97453	285.844	96.0974	6.58643	0.00301212	0.07378
MSTRG.11755.3	70.7927	0	141.585	Inf	Inf	0.00309687	0.0757188
MSTRG.4346.1	2324.58	237.957	4411.21	18.5379	4.2124	0.00319912	0.0777968
MSTRG.4339.1	1171.09	130.389	2211.79	16.9631	4.08432	0.00325079	0.0785942
MSTRG.9201.2	239.12	11.1625	467.077	41.8435	5.38693	0.0034057	0.0816462
MSTRG.8789.5	67.971	0	135.942	Inf	Inf	0.00368762	0.0864513
MSTRG.11066.1	184.953	6.64	363.267	54.7089	5.7737	0.00373856	0.0875003
MSTRG.3804.1	276.498	16.258	536.737	33.0137	5.04499	0.0039109	0.0908981
MSTRG.12670.11	396.566	31.174	761.958	24.4421	4.6113	0.00400107	0.0925566
MSTRG.13536.1	135.433	2.96671	267.9	90.3021	6.49669	0.00401233	0.0926982
MSTRG.185.13	205.406	0	410.811	Inf	Inf	0.00402894	0.0928046
MSTRG.19414.2	66.2509	0	132.502	Inf	Inf	0.00411406	0.0943408
MSTRG.9052.1	254.732	14.4314	495.032	34.3024	5.10024	0.00417649	0.0953106
MSTRG.16723.1	143.799	3.95363	283.644	71.7428	6.16476	0.00466368	0.10393
MSTRG.5709.1	873.154	1642.84	103.471	0.0629832	-3.98889	0.00469825	0.104399
MSTRG.480.1	136.65	3.42074	269.878	78.8947	6.30186	0.00477067	0.105662
MSTRG.13535.1	528.876	52.1105	1005.64	19.2982	4.2704	0.00477747	0.105769
MSTRG.11819.1	198.788	9.66271	387.914	40.1454	5.32716	0.0053364	0.115451
MSTRG.13314.12	94.3006	187.747	0.853784	0.00454751	-7.78071	0.00541017	0.116766
MSTRG.13036.1	138.296	3.98635	272.607	68.3849	6.09561	0.00547997	0.11772
MSTRG.5537.12	182.102	8.22138	355.983	43.2996	5.43628	0.00560712	0.11987
MSTRG.20390.2	61.6807	0	123.361	Inf	Inf	0.00565453	0.12074
MSTRG.15113.1	69.6561	139.312	0	0	-Inf	0.00572661	0.121751
MSTRG.4186.1	869.951	110.811	1629.09	14.7015	3.87789	0.005919	0.124595
MSTRG.14900.1	168.465	7.12019	329.81	46.3204	5.53358	0.00621126	0.129261
MSTRG.3977.1	149.556	1.9413	297.171	153.078	7.25813	0.00690931	0.140397
MSTRG.4039.3	58.748	0	117.496	Inf	Inf	0.0069121	0.140397
MSTRG.11212.4	691.874	88.0796	1295.67	14.7102	3.87874	0.00712502	0.144012
MSTRG.1442.1	230.479	445.678	15.28	0.0342848	-4.86629	0.00718522	0.144951
MSTRG.4337.1	393.901	39.5737	748.228	18.9072	4.24086	0.00724427	0.145715
MSTRG.247.3	106.276	2.24141	210.311	93.8299	6.55198	0.00759868	0.151494
MSTRG.16383.1	56.8892	0	113.778	Inf	Inf	0.00785761	0.155793
MSTRG.1887.1	165.028	7.84179	322.215	41.0895	5.3607	0.00794657	0.157158
MSTRG.15175.1	663.715	87.328	1240.1	14.2005	3.82787	0.00805023	0.158609
MSTRG.4345.11	365.599	36.7929	694.406	18.8734	4.23828	0.0080537	0.158609
MSTRG.1060.2	56.089	0	112.178	Inf	Inf	0.00833044	0.162547
MSTRG.14646.1	63.0798	126.16	0	0	-Inf	0.0085533	0.165405
MSTRG.8026.1	113.311	3.15461	223.467	70.8381	6.14645	0.00918589	0.17458
MSTRG.6367.3	54.7323	0	109.465	Inf	Inf	0.00921481	0.174884
MSTRG.6706.2	452.129	54.1645	850.094	15.6947	3.9722	0.00937357	0.176819
MSTRG.20541.3	55.7395	0	111.479	Inf	Inf	0.00970886	0.181397
MSTRG.66.8	698.268	0	1396.54	Inf	Inf	0.00996278	0.184865
MSTRG.19414.1	258.782	22.6951	494.868	21.8051	4.44659	0.010057	0.186102
MSTRG.7049.1	701.645	102.583	1300.71	12.6796	3.66443	0.0102737	0.188562
MSTRG.6723.1	239.868	20.0425	459.693	22.9359	4.51954	0.0103369	0.189084
MSTRG.8789.8	52.4524	0	104.905	Inf	Inf	0.0108455	0.195215
MSTRG.12670.6	419.741	51.6485	787.833	15.2538	3.93109	0.010949	0.196169
MSTRG.12835.3	1385.98	0	2771.96	Inf	Inf	0.0113306	0.200549
MSTRG.14443.1	67.2081	0.485325	133.931	275.961	8.10832	0.0117255	0.204985
MSTRG.14107.1	148.286	7.83335	288.739	36.8603	5.20399	0.0119944	0.208077
MSTRG.20327.5	138.097	6.67316	269.522	40.3889	5.33589	0.0120693	0.208841
MSTRG.1786.2	417.403	55.283	779.524	14.1006	3.81768	0.0131003	0.220683
MSTRG.5708.1	555.902	1027.98	83.8226	0.081541	-3.61633	0.013322	0.222959
MSTRG.20504.1	73.6169	1.00194	146.232	145.949	7.18932	0.0140474	0.230605
MSTRG.12940.2	48.6048	0	97.2095	Inf	Inf	0.0145191	0.236061
MSTRG.6705.1	2148.25	435.16	3861.33	8.87336	3.14948	0.0149323	0.240321
MSTRG.14083.1	107.041	3.99048	210.092	52.6482	5.71831	0.0151134	0.242369
MSTRG.16686.1	332.341	42.0648	622.617	14.8014	3.88766	0.0153182	0.244154
MSTRG.8568.13	1228.11	2456.23	0	0	-Inf	0.0156483	0.247356
MSTRG.6367.1	3390.04	6059.41	720.679	0.118936	-3.07175	0.015758	0.248412
MSTRG.11865.1	171.392	13.6379	329.146	24.1346	4.59303	0.0170227	0.260238
MSTRG.8752.1	144.707	9.51122	279.903	29.4287	4.87915	0.0171313	0.261331
MSTRG.2423.1	79.3502	1.72066	156.98	91.232	6.51147	0.0177392	0.265882
MSTRG.6532.1	99.82	3.71096	195.929	52.7974	5.72239	0.0178729	0.267217
MSTRG.8025.1	269.121	32.4084	505.833	15.6081	3.96422	0.0182436	0.27015
MSTRG.3653.1	45.4297	0	90.8594	Inf	Inf	0.0184238	0.270964
MSTRG.11638.1	86.6335	2.47068	170.796	69.1293	6.11123	0.0188017	0.274331
MSTRG.10163.1	98.4914	3.7472	193.236	51.568	5.68841	0.0188054	0.274331
MSTRG.2472.1	86.1525	2.46574	169.839	68.8797	6.10601	0.0190737	0.276464
MSTRG.13258.2	85.6246	2.42662	168.823	69.5709	6.12041	0.019623	0.281479
MSTRG.15769.1	142.39	9.87965	274.9	27.8248	4.7983	0.0196278	0.281479
MSTRG.8789.14	44.16	0	88.3201	Inf	Inf	0.0203379	0.286872
MSTRG.3681.1	62.3995	0.751454	124.048	165.077	7.36699	0.0203513	0.286912
MSTRG.15170.5	249.566	30.3778	468.755	15.4308	3.94774	0.020813	0.290127
MSTRG.12527.2	325.59	47.1768	604.004	12.803	3.67841	0.021182	0.292749
MSTRG.11461.4	43.2357	0	86.4715	Inf	Inf	0.021826	0.297378
MSTRG.10924.1	157.328	13.5766	301.08	22.1764	4.47095	0.0228818	0.304274
MSTRG.14105.7	123.381	0	246.761	Inf	Inf	0.0231779	0.306467
MSTRG.1619.3	440.551	76.0883	805.015	10.58	3.40327	0.0234255	0.308096
MSTRG.383.4	537.012	1074.02	0	0	-Inf	0.0236486	0.309525
MSTRG.3560.31	608.346	122.047	1094.64	8.96901	3.16495	0.025041	0.318804
MSTRG.8511.1	241.256	31.6562	450.857	14.2423	3.83211	0.0250543	0.318898
MSTRG.947.1	226.304	28.7527	423.855	14.7414	3.8818	0.0259555	0.3249
MSTRG.13682.1	382.688	699.535	65.8407	0.0941206	-3.40935	0.0262444	0.326444
MSTRG.20541.1	191.746	21.751	361.741	16.631	4.0558	0.0266622	0.329134
MSTRG.13221.2	228.482	0	456.964	Inf	Inf	0.0278491	0.337188
MSTRG.2100.1	125.353	9.88848	240.818	24.3534	4.60605	0.029929	0.349999
MSTRG.9039.1	319.829	639.658	0	0	-Inf	0.0306216	0.353257
MSTRG.17006.2	39.0796	0	78.1591	Inf	Inf	0.0306441	0.353257
MSTRG.15160.1	1661.63	2896.16	427.093	0.147469	-2.76152	0.0323126	0.36197
MSTRG.9948.1	68.5736	1.9413	135.206	69.6471	6.12199	0.03301	0.364368
MSTRG.171.5	115.011	221.532	8.4908	0.0383277	-4.70547	0.0330511	0.364593
MSTRG.1060.1	894.714	217.114	1572.31	7.2419	2.85637	0.0346991	0.374376
MSTRG.8375.1	113.917	9.11831	218.716	23.9865	4.58415	0.0368572	0.386859
MSTRG.1905.4	124.757	0	249.513	Inf	Inf	0.0370567	0.387574
MSTRG.7539.1	163.414	19.6837	307.145	15.604	3.96384	0.0377997	0.391008
MSTRG.15961.1	1480.43	398.244	2562.62	6.43479	2.68589	0.0382878	0.393705
MSTRG.14232.5	162.538	19.5851	305.491	15.5981	3.9633	0.0404419	0.403311
MSTRG.20103.1	427.251	92.6453	761.856	8.22336	3.03973	0.0405635	0.403781
MSTRG.12123.1	35.3379	0	70.6759	Inf	Inf	0.0415371	0.408578
MSTRG.9283.1	35.2681	0	70.5363	Inf	Inf	0.0417054	0.409253
MSTRG.18400.2	87.1415	5.09591	169.187	33.2005	5.05314	0.0417633	0.409253
MSTRG.11732.1	46.4291	0.485325	92.3729	190.332	7.57237	0.0418749	0.409682
MSTRG.1455.2	129.073	13.5262	244.62	18.0849	4.17671	0.0420545	0.410285
MSTRG.15114.1	12459	21108.1	3809.99	0.180499	-2.46994	0.042925	0.413967
MSTRG.3302.9	87.9228	0	175.846	Inf	Inf	0.0432022	0.414981
MSTRG.14288.1	49.4996	0.751454	98.2478	130.744	7.0306	0.0433003	0.415454
MSTRG.13219.6	1191.97	328.325	2055.62	6.26094	2.64638	0.0438291	0.417948
MSTRG.386.1	643.422	159.099	1127.74	7.08831	2.82544	0.0438355	0.417948
MSTRG.8397.1	3237.42	961.929	5512.91	5.7311	2.51881	0.0439452	0.418533
MSTRG.7745.1	34.5888	0	69.1776	Inf	Inf	0.0440929	0.419073
MSTRG.5413.1	249.331	44.5758	454.085	10.1868	3.34863	0.0441195	0.419178
MSTRG.15097.7	147.025	18.1803	275.869	15.174	3.92353	0.0444231	0.420879
MSTRG.8472.6	34.4409	0	68.8818	Inf	Inf	0.0444753	0.420967
MSTRG.15879.1	509.867	121.513	898.22	7.39197	2.88596	0.0447755	0.422128
MSTRG.2333.1	159.99	21.2383	298.742	14.0662	3.81416	0.0453616	0.425672
MSTRG.4344.1	425.142	96.4579	753.826	7.81508	2.96626	0.045409	0.425895
MSTRG.2084.1	168.76	23.5215	313.998	13.3494	3.7387	0.0456375	0.42752
MSTRG.4341.1	197.09	30.8724	363.308	11.768	3.5568	0.0458458	0.428557
MSTRG.8388.1	202.105	32.6025	371.607	11.3981	3.51072	0.046154	0.430273
MSTRG.6423.1	1255.04	354.454	2155.62	6.08153	2.60443	0.0463289	0.431295
MSTRG.11864.1	139.252	278.082	0.422188	0.00151822	-9.36341	0.0469465	0.43458
MSTRG.16508.1	135.406	270.811	0	0	-Inf	0.0469625	0.43459
MSTRG.5641.6	899.261	244.729	1553.79	6.34903	2.66654	0.0471624	0.435727
MSTRG.20199.1	410.261	93.8959	726.626	7.73863	2.95208	0.0472008	0.435727
MSTRG.11377.3	74.1813	0	148.363	Inf	Inf	0.047993	0.438119
MSTRG.12708.1	336.161	71.8163	600.505	8.36168	3.06379	0.0481515	0.438617
MSTRG.13606.4	98.1523	8.01551	188.289	23.4906	4.55401	0.0483082	0.439748
MSTRG.4517.2	642.232	166.927	1117.54	6.69477	2.74304	0.0483593	0.439908
MSTRG.9052.2	183.208	28.4594	337.956	11.875	3.56986	0.0488189	0.442087
MSTRG.15001.1	115.415	11.8339	218.995	18.5058	4.2099	0.0496674	0.445385
MSTRG.15368.2	121.485	242.97	0	0	-Inf	0.0498824	0.445999
MSTRG.15170.1	108.658	10.3382	206.978	20.0207	4.32342	0.0503017	0.4478
MSTRG.20561.2	81.7088	5.18052	158.237	30.5446	4.93285	0.0505035	0.448895
MSTRG.12314.1	292.143	60.515	523.771	8.65522	3.11357	0.0512645	0.452547
MSTRG.19458.1	62.7055	2.45791	122.953	50.0234	5.64453	0.0525929	0.459005
MSTRG.7776.1	157.924	22.8898	292.958	12.7986	3.67791	0.0525993	0.459005
MSTRG.20327.4	128.754	15.6771	241.831	15.4257	3.94727	0.0534883	0.462376
MSTRG.2286.1	42.5412	0.500969	84.5814	168.835	7.39947	0.0536777	0.463147
MSTRG.1357.1	382.957	90.5467	675.367	7.45877	2.89894	0.0541966	0.4656
MSTRG.20017.1	128.816	15.7618	241.87	15.3453	3.93973	0.0545962	0.467572
MSTRG.12308.1	2613.58	4393.72	833.447	0.189691	-2.39828	0.0551618	0.470253
MSTRG.8324.5	31.9268	0	63.8536	Inf	Inf	0.0553628	0.471119
MSTRG.8472.4	56.905	0	113.81	Inf	Inf	0.0555082	0.471201
MSTRG.529.1	3879.43	1266.88	6491.99	5.12439	2.35738	0.0568564	0.476712
MSTRG.20062.1	3394.23	5672.41	1116.04	0.196749	-2.34557	0.0583735	0.482357
MSTRG.66.7	2862.95	931.247	4794.66	5.14864	2.36419	0.0586505	0.483266
MSTRG.13032.1	37.0828	0.242662	73.9228	304.632	8.25093	0.0587459	0.483809
MSTRG.11211.1	1865.84	597.512	3134.17	5.24536	2.39104	0.0593518	0.485967
MSTRG.12211.1	78.456	5.42093	151.491	27.9456	4.80455	0.0594118	0.486112
MSTRG.17844.1	238.942	48.7971	429.087	8.79331	3.13641	0.0602683	0.489639
MSTRG.14232.1	410.193	1.73631	818.65	471.488	8.88108	0.062659	0.501013
MSTRG.4842.2	39.9651	0.485325	79.4449	163.694	7.35486	0.0633752	0.503373
MSTRG.8568.15	6478.54	10712.7	2244.37	0.209505	-2.25494	0.0640821	0.506042
MSTRG.18440.2	244.067	52.843	435.291	8.23743	3.04219	0.0648594	0.509349
MSTRG.16952.1	185.115	33.8869	336.343	9.92547	3.31113	0.0650089	0.509561
MSTRG.10974.4	39.7325	0	79.4649	Inf	Inf	0.0653115	0.510414
MSTRG.1933.1	208.47	41.3321	375.607	9.08754	3.18389	0.0656709	0.511637
MSTRG.19344.3	149.654	23.8383	275.47	11.5558	3.53055	0.0668897	0.516113
MSTRG.7057.1	225.796	47.5707	404.022	8.49308	3.08629	0.06745	0.518775
MSTRG.15428.2	37.5056	0	75.0111	Inf	Inf	0.0681658	0.521867
MSTRG.20271.1	79.5149	6.43976	152.59	23.695	4.56651	0.0683056	0.52259
MSTRG.11372.2	3791.49	1327.17	6255.8	4.71365	2.23684	0.0687001	0.52458
MSTRG.4842.1	33.0719	66.1438	0	0	-Inf	0.0689813	0.525457
MSTRG.5985.1	35.7812	0	71.5624	Inf	Inf	0.0697608	0.52755
MSTRG.13683.9	61.0161	122.032	0	0	-Inf	0.0700635	0.529099
MSTRG.11492.1	34.2422	0.242662	68.2417	281.221	8.13556	0.0723931	0.538204
MSTRG.12211.2	28.7633	0	57.5267	Inf	Inf	0.073205	0.54059
MSTRG.4020.1	28.635	0	57.2699	Inf	Inf	0.0733727	0.5411
MSTRG.2550.8	145.864	4.48282	287.246	64.077	6.00173	0.0751969	0.546594
MSTRG.8324.4	28.4089	0	56.8178	Inf	Inf	0.0752289	0.546594
MSTRG.14048.2	28.2983	0	56.5966	Inf	Inf	0.075322	0.546903
MSTRG.1100.2	89.6379	9.48819	169.788	17.8946	4.16145	0.0758984	0.549246
MSTRG.2169.1	73.9237	5.96163	141.886	23.7998	4.57288	0.076636	0.551647
MSTRG.3560.19	208.804	45.5513	372.056	8.16785	3.02996	0.0766584	0.551647
MSTRG.1100.1	110.576	14.8723	206.281	13.8702	3.79391	0.0772935	0.554427
MSTRG.16727.1	210.805	47.2265	374.384	7.92742	2.98685	0.0795775	0.563215
MSTRG.1926.1	1075.86	1784.64	367.086	0.205692	-2.28144	0.0797418	0.563641
MSTRG.17064.1	401.143	115.209	687.078	5.96377	2.57622	0.081395	0.57063
MSTRG.10974.3	129.418	21.049	237.788	11.2969	3.49785	0.0828002	0.576596
MSTRG.7891.1	385.262	112.141	658.382	5.871	2.55361	0.0847332	0.584565
MSTRG.833.1	1233.3	437.096	2029.51	4.64316	2.21511	0.086388	0.590336
MSTRG.19021.2	26.7476	0	53.4952	Inf	Inf	0.0871739	0.593309
MSTRG.66.3	246.458	62.1859	430.73	6.92649	2.79213	0.0883752	0.597029
MSTRG.20327.2	171.145	35.6243	306.665	8.60832	3.10573	0.088711	0.598203
MSTRG.511.1	1353.03	492.088	2213.97	4.49913	2.16964	0.0904029	0.603892
MSTRG.2189.1	1215.5	440.103	1990.89	4.52369	2.1775	0.0916396	0.608179
MSTRG.11394.2	26.0416	0	52.0832	Inf	Inf	0.092648	0.611939
MSTRG.18515.4	26.0815	0	52.1629	Inf	Inf	0.0929419	0.612729
MSTRG.76.1	187.957	43.3728	332.542	7.66706	2.93867	0.0947935	0.61938
MSTRG.13463.17	40.9137	0.249045	81.5783	327.564	8.35563	0.0954408	0.621807
MSTRG.15116.1	3920.25	6308.3	1532.19	0.242885	-2.04165	0.0956749	0.6227
MSTRG.6991.1	59.7148	4.23171	115.198	27.2226	4.76673	0.0963039	0.624947
MSTRG.7605.2	30.4339	60.8678	0	0	-Inf	0.0987403	0.63249
MSTRG.17305.1	25.2269	0	50.4538	Inf	Inf	0.0991724	0.634268
MSTRG.6922.1	76.2209	8.13921	144.303	17.7293	4.14806	0.0992047	0.634338
MSTRG.18215.1	660.583	228.955	1092.21	4.77041	2.25411	0.0994578	0.635048
MSTRG.5112.1	29.1383	58.2766	0	0	-Inf	0.100742	0.638819
MSTRG.9263.1	149.509	268.067	30.9505	0.115458	-3.11456	0.101213	0.640297
MSTRG.5740.1	717.36	1180.23	254.493	0.21563	-2.21337	0.10127	0.640431
MSTRG.11465.2	614.854	214.51	1015.2	4.73262	2.24264	0.101657	0.641452
MSTRG.1647.2	258.312	3.22564	513.399	159.162	7.31435	0.103045	0.646368
MSTRG.11320.1	127.608	2.70696	252.508	93.2811	6.54351	0.103441	0.648177
MSTRG.20060.1	209.013	364.354	53.6725	0.147309	-2.76309	0.10477	0.65348
MSTRG.5656.1	103.699	16.6485	190.749	11.4574	3.51821	0.104865	0.653914
MSTRG.1905.2	70.6662	140.479	0.853286	0.00607412	-7.36311	0.105155	0.655192
MSTRG.5537.13	57.57	4.23477	110.905	26.1892	4.7109	0.105158	0.655192
MSTRG.14905.1	104.921	17.0184	192.824	11.3304	3.50212	0.105596	0.656293
MSTRG.5657.1	99.2061	15.3988	183.013	11.8849	3.57106	0.105629	0.656411
MSTRG.6444.1	513.111	175.6	850.622	4.84409	2.27623	0.107162	0.662513
MSTRG.15528.1	9438.85	3902.04	14975.7	3.83791	1.94032	0.107949	0.665173
MSTRG.13713.3	41.1086	1.50291	80.7143	53.7054	5.747	0.108177	0.665822
MSTRG.14176.3	62.0899	5.44026	118.739	21.8261	4.44798	0.108697	0.667721
MSTRG.2182.1	162.085	37.3228	286.846	7.68555	2.94215	0.108925	0.668679
MSTRG.4490.3	27.146	54.2919	0	0	-Inf	0.109738	0.671417
MSTRG.9255.2	24.065	0	48.1299	Inf	Inf	0.109802	0.671481
MSTRG.6969.2	43.3135	0.491708	86.1352	175.176	7.45266	0.111487	0.678748
MSTRG.11789.2	71.4585	7.8846	135.032	17.1261	4.09812	0.111955	0.680002
MSTRG.2606.1	1318.75	518.39	2119.12	4.08789	2.03136	0.112231	0.681033
MSTRG.3737.1	525.72	186.05	865.389	4.65138	2.21766	0.112473	0.682019
MSTRG.8476.3	23.6425	0	47.285	Inf	Inf	0.114083	0.687015
MSTRG.8937.1	1415.51	562.662	2268.35	4.03146	2.0113	0.114121	0.687047
MSTRG.13598.1	172.885	42.4497	303.319	7.14538	2.83701	0.114244	0.687341
MSTRG.11487.1	1266.97	501.029	2032.92	4.05748	2.02058	0.114938	0.690059
MSTRG.1838.1	23.6065	0	47.2129	Inf	Inf	0.114997	0.690059
MSTRG.6367.2	243.099	69.4905	416.707	5.9966	2.58414	0.115332	0.690998
MSTRG.887.1	53.2824	1.73775	104.827	60.3235	5.91465	0.118345	0.701343
MSTRG.12220.1	42.6277	1.99606	83.2594	41.7119	5.38239	0.119223	0.704097
MSTRG.17169.3	98.5952	1.47162	195.719	132.995	7.05523	0.120615	0.708987
MSTRG.4095.1	355.565	592.676	118.454	0.199862	-2.32292	0.121555	0.712424
MSTRG.11023.8	22.967	0	45.934	Inf	Inf	0.122562	0.716229
MSTRG.13813.1	211.001	59.4234	362.578	6.1016	2.60919	0.122694	0.716604
MSTRG.7074.2	3916.49	1681.07	6151.92	3.65954	1.87166	0.12414	0.721476
MSTRG.13090.1	4135.11	1784.38	6485.84	3.63479	1.86187	0.125827	0.726989
MSTRG.7520.1	32.3871	0.751454	64.0228	85.1986	6.41276	0.127309	0.731569
MSTRG.14864.1	25.2781	50.5562	0	0	-Inf	0.127548	0.732398
MSTRG.14313.1	178.761	48.4587	309.064	6.37788	2.67308	0.129241	0.737576
MSTRG.66.20	2050.67	880.184	3221.15	3.65963	1.8717	0.129988	0.739737
MSTRG.13221.1	1176.46	489.94	1862.98	3.80246	1.92693	0.132152	0.748036
MSTRG.11256.21	280.192	469.438	90.9464	0.193735	-2.36785	0.132288	0.748335
MSTRG.13134.1	37.2615	1.4638	73.0591	49.9107	5.64128	0.134283	0.753944
MSTRG.2456.3	62.3345	6.84561	117.823	17.2115	4.1053	0.134401	0.754293
MSTRG.6947.1	21.8539	0	43.7077	Inf	Inf	0.134715	0.755228
MSTRG.9039.2	834.655	1330.36	338.948	0.254778	-1.97268	0.137488	0.764447
MSTRG.1633.1	307.47	105.451	509.488	4.83151	2.27247	0.138193	0.766099
MSTRG.13174.1	87.9274	15.0929	160.762	10.6515	3.41298	0.138235	0.766099
MSTRG.2167.1	1221.88	1924.89	518.871	0.269558	-1.89133	0.140201	0.771876
MSTRG.14256.1	705.449	286.2	1124.7	3.92976	1.97444	0.141278	0.775017
MSTRG.5129.2	23.9066	47.8132	0	0	-Inf	0.142608	0.778732
MSTRG.16536.1	25.4029	0.242662	50.5632	208.368	7.70299	0.143014	0.779668
MSTRG.3560.23	663.369	270.716	1056.02	3.90084	1.96378	0.145618	0.786645
MSTRG.6706.4	146.142	20.2893	271.994	13.4058	3.74479	0.147967	0.793403
MSTRG.12428.1	910.545	388.213	1432.88	3.69096	1.884	0.149195	0.79591
MSTRG.8133.1	36.828	1.69864	71.9574	42.3618	5.40469	0.150368	0.799461
MSTRG.2791.1	24.7513	0.250485	49.2522	196.627	7.61932	0.150489	0.799711
MSTRG.3560.30	379.745	144.689	614.801	4.24913	2.08717	0.150868	0.801133
MSTRG.1741.3	20.5673	0	41.1345	Inf	Inf	0.151601	0.803155
MSTRG.3424.1	645.09	1023.4	266.778	0.260677	-1.93966	0.153439	0.808716
MSTRG.13683.3	1882.4	851.186	2913.62	3.42301	1.77527	0.153677	0.809263
MSTRG.1407.1	278.221	98.4171	458.025	4.65391	2.21844	0.155887	0.814397
MSTRG.3560.13	751.163	323.226	1179.1	3.64792	1.86707	0.160351	0.825971
MSTRG.15111.9	21453.3	32651.3	10255.3	0.314087	-1.67076	0.161068	0.828667
MSTRG.20441.3	39.4455	2.46574	76.4252	30.9949	4.95396	0.161415	0.82932
MSTRG.4156.10	153.36	14.5281	292.191	20.1121	4.32999	0.161455	0.829395
MSTRG.2942.1	176.258	54.3004	298.215	5.49195	2.45732	0.164383	0.83711
MSTRG.16258.10	370.214	145.089	595.338	4.10326	2.03677	0.166117	0.841274
MSTRG.2514.1	163.27	49.2017	277.338	5.63676	2.49487	0.167383	0.844845
MSTRG.9123.5	83.3265	16.1937	150.459	9.29122	3.21587	0.167937	0.846283
MSTRG.11480.1	19.4435	0	38.8871	Inf	Inf	0.167975	0.846283
MSTRG.5118.1	1251.46	1931.34	571.583	0.295952	-1.75656	0.16841	0.847374
MSTRG.8036.1	658.263	284.348	1032.18	3.62999	1.85996	0.168541	0.847374
MSTRG.11788.1	107.315	26.2355	188.395	7.18091	2.84417	0.170438	0.851483
MSTRG.4517.3	598.947	259.566	938.329	3.615	1.85399	0.170727	0.851951
MSTRG.7711.2	45.0734	1.48726	88.6595	59.6125	5.89754	0.171232	0.852973
MSTRG.11256.20	65.0277	120.21	9.84547	0.0819023	-3.60995	0.172282	0.855059
MSTRG.2329.1	198.811	66.2696	331.352	5.00006	2.32195	0.173167	0.857171
MSTRG.7298.1	19.1512	0	38.3025	Inf	Inf	0.173238	0.857364
MSTRG.5988.1	194.574	325.069	64.0802	0.197128	-2.34279	0.173316	0.857671
MSTRG.15763.1	19.0715	0	38.143	Inf	Inf	0.174151	0.859526
MSTRG.1485.1	1309.67	2010.9	608.443	0.302573	-1.72465	0.174586	0.860464
MSTRG.11865.2	84.3629	17.068	151.658	8.88551	3.15145	0.17525	0.861959
MSTRG.7995.1	145.04	42.3628	247.718	5.84753	2.54783	0.176601	0.865225
MSTRG.164.1	308.251	119.723	496.779	4.14941	2.05291	0.176686	0.865325
MSTRG.16234.2	18.9683	0	37.9367	Inf	Inf	0.177397	0.867139
MSTRG.7164.1	228.014	375.254	80.7753	0.215255	-2.21588	0.177405	0.867139
MSTRG.19687.6	473.826	200.407	747.244	3.72864	1.89865	0.17803	0.868036
MSTRG.4448.1	528.859	829.969	227.749	0.274406	-1.86562	0.178379	0.868338
MSTRG.2546.6	1196.24	559.535	1832.95	3.27585	1.71187	0.180953	0.874316
MSTRG.4579.1	29.1116	57.361	0.862197	0.0150311	-6.05591	0.181551	0.87537
MSTRG.9201.1	478.264	205.231	751.297	3.66073	1.87213	0.182949	0.878038
MSTRG.15526.1	433.848	684.715	182.982	0.267238	-1.9038	0.18407	0.881421
MSTRG.12559.1	1466.77	2232.78	700.746	0.313844	-1.67188	0.184114	0.881519
MSTRG.3560.27	254.994	96.9816	413.007	4.25861	2.09038	0.189296	0.893741
MSTRG.16007.1	548.375	852.794	243.955	0.286066	-1.80558	0.190531	0.896118
MSTRG.18171.5	18.1061	0	36.2123	Inf	Inf	0.192249	0.899533
MSTRG.9026.2	113.653	31.1054	196.202	6.30764	2.6571	0.192265	0.899533
MSTRG.4470.1	162.671	53.3609	271.981	5.09701	2.34965	0.19289	0.900726
MSTRG.16279.1	547.217	850.237	244.197	0.287211	-1.79982	0.192897	0.900726
MSTRG.7568.1	401.848	173.733	629.962	3.62603	1.85839	0.197599	0.909865
MSTRG.16217.1	297.619	474.109	121.129	0.255489	-1.96867	0.19945	0.913758
MSTRG.10951.1	98.7871	25.7136	171.861	6.68366	2.74064	0.199967	0.91453
MSTRG.4111.1	74.1788	15.3442	133.013	8.66865	3.11581	0.201629	0.918171
MSTRG.13272.1	291.223	463.973	118.473	0.255345	-1.96948	0.20286	0.920815
MSTRG.8767.20	4067.25	6376.94	1757.57	0.275613	-1.85928	0.203103	0.920815
MSTRG.7819.1	25.2019	0.727987	49.6758	68.2372	6.09249	0.205976	0.925942
MSTRG.9848.2	131.49	41.1148	221.865	5.39624	2.43196	0.206076	0.925963
MSTRG.13683.5	2090.85	1063.87	3117.83	2.93064	1.55122	0.207911	0.929697
MSTRG.12429.1	29.3675	57.4417	1.2933	0.0225149	-5.47297	0.208265	0.929975
MSTRG.16220.1	106.018	182.727	29.3088	0.160397	-2.64028	0.20901	0.931202
MSTRG.12283.2	17.0722	0	34.1444	Inf	Inf	0.210831	0.934313
MSTRG.13940.1	2223.34	1142.61	3304.07	2.89167	1.53191	0.212179	0.93739
MSTRG.13606.1	361.024	160.558	561.49	3.49712	1.80617	0.212887	0.938557
MSTRG.9897.1	247.494	394.968	100.021	0.253237	-1.98144	0.214706	0.942734
MSTRG.13220.1	415.97	187.862	644.078	3.42845	1.77756	0.214874	0.94286
MSTRG.17006.1	274.286	435.528	113.043	0.259554	-1.94589	0.21514	0.942878
MSTRG.6149.1	112.567	33.7027	191.43	5.67997	2.50588	0.215418	0.943258
MSTRG.1460.1	211.994	341.868	82.1195	0.240208	-2.05764	0.216758	0.946349
MSTRG.5641.2	342.896	151.901	533.89	3.51472	1.81341	0.218208	0.948185
MSTRG.13713.1	274.428	114.303	434.553	3.80176	1.92667	0.218243	0.948246
MSTRG.12457.6	614.129	292.82	935.437	3.19458	1.67563	0.218438	0.948802
MSTRG.2586.2	25.847	0.996182	50.6979	50.8922	5.66937	0.219687	0.950719
MSTRG.12936.11	71.7091	129.892	13.5259	0.104132	-3.26351	0.221598	0.954368
MSTRG.66.5	111.288	13.8788	208.697	15.0371	3.91045	0.222283	0.954753
MSTRG.14373.2	588.45	894.791	282.109	0.315279	-1.6653	0.223392	0.957386
MSTRG.12562.1	486.03	743.903	228.158	0.306704	-1.70508	0.225082	0.961304
MSTRG.10373.1	806.995	1212.54	401.445	0.331077	-1.59476	0.226104	0.962923
MSTRG.1939.1	2148.99	1127.11	3170.87	2.81329	1.49226	0.226636	0.963737
MSTRG.20327.3	79.6656	17.5061	141.825	8.10144	3.01818	0.226783	0.96385
MSTRG.14635.12	590.657	41.33	1139.98	27.5825	4.78568	0.227029	0.964054
MSTRG.17216.2	808.894	1213.39	404.399	0.33328	-1.58519	0.228377	0.967212
MSTRG.6782.1	279.966	439.375	120.558	0.274385	-1.86573	0.22943	0.969045
MSTRG.12326.1	107.412	32.0677	182.757	5.69911	2.51074	0.229792	0.969935
MSTRG.13007.1	1279.08	1895.9	662.261	0.349313	-1.51741	0.230911	0.971754
MSTRG.1786.1	73.3811	7.66108	139.101	18.1569	4.18244	0.233203	0.975261
MSTRG.6020.1	33.1844	63.8263	2.54254	0.0398352	-4.64981	0.2334	0.975574
MSTRG.11485.1	23.4278	0.727987	46.1275	63.3631	5.98557	0.234557	0.977539
MSTRG.19934.2	1244.97	655.239	1834.7	2.80005	1.48545	0.236605	0.981014
MSTRG.328.1	2309.2	1242.57	3375.83	2.71681	1.44191	0.237024	0.981626
MSTRG.5510.6	1843.98	2710.43	977.521	0.360651	-1.47132	0.237436	0.982041
MSTRG.1704.1	47.8516	7.45178	88.2515	11.843	3.56596	0.238754	0.984718
MSTRG.13518.1	199.518	79.8438	319.193	3.99772	1.99918	0.24009	0.986929
MSTRG.2685.1	184.82	73.2965	296.343	4.04307	2.01545	0.240847	0.987554
MSTRG.7623.1	2996.3	1631.35	4361.25	2.6734	1.41867	0.242817	0.991152
MSTRG.19576.1	78.6251	20.4257	136.824	6.69864	2.74387	0.244418	0.99411
MSTRG.7726.1	101.295	31.1534	171.437	5.503	2.46022	0.245014	0.994608
MSTRG.1471.1	17.3504	34.7007	0	0	-Inf	0.245557	0.995172
MSTRG.2336.1	336.842	517.182	156.501	0.302603	-1.7245	0.248083	1
MSTRG.11204.1	17.2684	34.5369	0	0	-Inf	0.248239	1
MSTRG.16007.2	489.385	239.993	738.777	3.07832	1.62214	0.248938	1
MSTRG.13551.1	146.471	238.474	54.4674	0.228399	-2.13037	0.250365	1
MSTRG.13683.6	3168.69	1748.16	4589.23	2.62518	1.39242	0.251056	1
MSTRG.12372.1	2420.2	1332.05	3508.36	2.63381	1.39715	0.251492	1
MSTRG.7795.1	138.704	50.9808	226.428	4.44143	2.15103	0.251809	1
MSTRG.6780.1	2446.15	3550.51	1341.78	0.377913	-1.40387	0.252383	1
MSTRG.9061.2	255.859	398.267	113.451	0.284863	-1.81166	0.252579	1
MSTRG.532.1	16.9864	33.9727	0	0	-Inf	0.253291	1
MSTRG.240.1	23.6454	0.97065	46.3201	47.7207	5.57654	0.253996	1
MSTRG.2025.3	16.9671	33.9342	0	0	-Inf	0.254119	1
MSTRG.3560.37	237.281	77.7862	396.775	5.10084	2.35074	0.255212	1
MSTRG.5641.1	248.044	65.4802	430.607	6.57614	2.71724	0.255583	1
MSTRG.9396.1	65.077	15.147	115.007	7.5927	2.92461	0.255602	1
MSTRG.11814.1	31.448	2.71397	60.1821	22.1749	4.47086	0.255732	1
MSTRG.11373.1	3464.31	1938.03	4990.58	2.57507	1.36461	0.257732	1
MSTRG.16800.2	16.8106	33.6211	0	0	-Inf	0.257935	1
MSTRG.19404.1	76.6584	20.7176	132.599	6.40033	2.67815	0.260606	1
MSTRG.12334.1	1321.41	722.278	1920.55	2.65901	1.41089	0.261116	1
MSTRG.9556.3	80.83	23.0353	138.625	6.01791	2.58926	0.262772	1
MSTRG.7177.1	277.268	426.365	128.171	0.300614	-1.73402	0.263467	1
MSTRG.3276.1	492.924	250.738	735.109	2.93178	1.55178	0.263848	1
MSTRG.15680.3	280.171	132.285	428.057	3.23588	1.69416	0.268473	1
MSTRG.13683.2	1612.86	900.871	2324.84	2.58066	1.36774	0.269764	1
MSTRG.14711.1	325.731	494.258	157.204	0.31806	-1.65263	0.271079	1
MSTRG.3560.1	955.18	1391.36	519.002	0.373018	-1.42268	0.271684	1
MSTRG.534.1	17.2929	0.249045	34.3369	137.874	7.10721	0.273593	1
MSTRG.13318.1	809.424	1181.74	437.111	0.369889	-1.43484	0.27394	1
MSTRG.19441.2	160.284	66.5104	254.057	3.81981	1.9335	0.275321	1
MSTRG.7041.1	1083.24	599.178	1567.3	2.61574	1.38722	0.275529	1
MSTRG.11522.1	616.428	905.755	327.101	0.361136	-1.46939	0.278333	1
MSTRG.17240.1	1394.58	2360.21	428.947	0.181741	-2.46004	0.283225	1
MSTRG.12047.11	289.594	38.353	540.834	14.1015	3.81778	0.283481	1
MSTRG.10047.1	186.571	291.617	81.5252	0.279563	-1.83876	0.28413	1
MSTRG.2280.2	321.999	162.817	481.182	2.95536	1.56333	0.286684	1
MSTRG.4150.1	1006.94	564.216	1449.67	2.56936	1.36141	0.286887	1
MSTRG.5510.8	3077.54	4370.64	1784.44	0.40828	-1.29237	0.287421	1
MSTRG.4095.3	988.194	1426.02	550.369	0.385948	-1.37352	0.287825	1
MSTRG.20027.4	209.963	96.6266	323.299	3.34586	1.74237	0.289669	1
MSTRG.13684.3	321.853	161.081	482.624	2.99615	1.58311	0.289742	1
MSTRG.11083.1	778.834	1127.77	429.896	0.38119	-1.39142	0.291443	1
MSTRG.3445.1	42.8877	7.52254	78.2529	10.4025	3.37885	0.292429	1
MSTRG.14411.1	477.476	253.667	701.284	2.76458	1.46706	0.292527	1
MSTRG.6989.1	13.5908	0	27.1815	Inf	Inf	0.293115	1
MSTRG.11214.1	142.765	227.691	57.8397	0.254028	-1.97694	0.293325	1
MSTRG.6560.1	489.94	719.534	260.346	0.361826	-1.46663	0.293748	1
MSTRG.3167.1	658.19	956.216	360.164	0.376655	-1.40868	0.294085	1
MSTRG.11053.1	19.8968	0.727987	39.0656	53.6625	5.74584	0.295905	1
MSTRG.11789.1	72.4511	21.4363	123.466	5.75966	2.52598	0.29641	1
MSTRG.13270.1	69.8155	119.785	19.8458	0.165678	-2.59354	0.29797	1
MSTRG.18907.1	636.63	924.103	349.157	0.377834	-1.40418	0.298174	1
MSTRG.13982.1	61.966	107.774	16.158	0.149925	-2.73768	0.298638	1
MSTRG.14094.1	544.21	297.568	790.851	2.65772	1.41019	0.299388	1
MSTRG.2025.1	225.611	344.59	106.632	0.309447	-1.69224	0.299761	1
MSTRG.10242.4	576.83	317.904	835.756	2.62895	1.39449	0.303801	1
MSTRG.7066.1	114.08	44.371	183.788	4.14208	2.05035	0.304235	1
MSTRG.3669.1	109.028	176.647	41.4093	0.234418	-2.09284	0.306365	1
MSTRG.16758.5	401.78	589.961	213.599	0.362056	-1.46571	0.308348	1
MSTRG.12806.1	76.6813	24.5068	128.856	5.25797	2.39451	0.308432	1
MSTRG.14247.9	407.511	219.926	595.096	2.7059	1.43611	0.308889	1
MSTRG.7999.1	253.287	126.072	380.502	3.01813	1.59365	0.309535	1
MSTRG.11465.1	233.68	114.714	352.646	3.07414	1.62018	0.311298	1
MSTRG.19650.1	1454.72	2055.88	853.559	0.41518	-1.26819	0.311829	1
MSTRG.18008.2	12.9364	0	25.8728	Inf	Inf	0.312013	1
MSTRG.12561.1	869.773	1239.82	499.721	0.403058	-1.31094	0.312747	1
MSTRG.7819.2	12.8815	0	25.7629	Inf	Inf	0.313186	1
MSTRG.14167.1	1128.52	1600.32	656.717	0.410366	-1.28502	0.313367	1
MSTRG.8823.1	106.105	40.8434	171.368	4.19572	2.06892	0.313999	1
MSTRG.976.1	77.4531	25.1277	129.778	5.16477	2.3687	0.316463	1
MSTRG.10487.1	17.3685	0.500969	34.236	68.3396	6.09465	0.316497	1
MSTRG.10701.7	3218.37	1947.87	4488.87	2.30451	1.20446	0.316874	1
MSTRG.13468.1	97.1731	36.234	158.112	4.36364	2.12553	0.318089	1
MSTRG.14899.1	1027.48	1454.8	600.166	0.412542	-1.27739	0.31884	1
MSTRG.1212.1	520.166	751.298	289.034	0.384713	-1.37814	0.319085	1
MSTRG.4096.1	349.058	513.208	184.907	0.360297	-1.47274	0.319286	1
MSTRG.7833.1	449.421	248.685	650.157	2.61438	1.38647	0.319787	1
MSTRG.11422.1	256.727	383.167	130.286	0.340023	-1.5563	0.322772	1
MSTRG.12560.1	272.943	405.389	140.498	0.346575	-1.52876	0.32406	1
MSTRG.5644.1	161.682	74.2991	249.064	3.35218	1.7451	0.324166	1
MSTRG.20418.1	1834.58	2563.43	1105.74	0.431349	-1.21307	0.327139	1
MSTRG.401.1	56.5664	11.9198	101.213	8.4912	3.08597	0.32767	1
MSTRG.1388.1	290.115	152.165	428.066	2.81318	1.4922	0.328563	1
MSTRG.382.1	88.4565	32.6744	144.239	4.41443	2.14223	0.330745	1
MSTRG.7729.10	46.4669	10.8589	82.0749	7.55828	2.91806	0.33162	1
MSTRG.10242.3	612.14	355.367	868.913	2.44511	1.2899	0.335305	1
MSTRG.3276.2	1468.89	893.176	2044.6	2.28913	1.1948	0.335695	1
MSTRG.6778.1	334.538	488.247	180.829	0.370364	-1.43298	0.336396	1
MSTRG.11866.1	24.224	2.20949	46.2385	20.9272	4.38731	0.336986	1
MSTRG.4148.1	561.328	800.327	322.33	0.402748	-1.31205	0.337394	1
MSTRG.10787.1	100.931	161.85	40.011	0.247209	-2.01619	0.338147	1
MSTRG.1682.1	12.0465	0	24.0931	Inf	Inf	0.339602	1
MSTRG.10635.1	485.878	278.326	693.429	2.49143	1.31697	0.340836	1
MSTRG.13952.1	393.082	220.497	565.666	2.56541	1.35919	0.341099	1
MSTRG.4518.1	574.839	333.563	816.116	2.44667	1.29082	0.341355	1
MSTRG.2277.1	210.471	106.81	314.132	2.94104	1.55632	0.341829	1
MSTRG.13559.7	1954.05	2705.27	1202.83	0.444624	-1.16934	0.342712	1
MSTRG.14888.2	59.075	17.9874	100.163	5.56848	2.47728	0.344414	1
MSTRG.9926.2	45.3063	8.18884	82.4237	10.0654	3.33133	0.345169	1
MSTRG.1874.1	415.973	235.861	596.085	2.52727	1.33758	0.345854	1
MSTRG.1034.17	45.3863	10.9849	79.7878	7.2634	2.86065	0.346452	1
MSTRG.14412.1	11.8352	0	23.6704	Inf	Inf	0.346621	1
MSTRG.13713.2	106.963	45.1338	168.793	3.73982	1.90297	0.347708	1
MSTRG.19343.1	250.645	369.046	132.244	0.358339	-1.4806	0.348164	1
MSTRG.14547.1	13.2761	26.5522	0	0	-Inf	0.348869	1
MSTRG.18057.1	164.061	249.74	78.381	0.31385	-1.67185	0.348901	1
MSTRG.14362.1	610.233	861.01	359.456	0.417482	-1.26021	0.352128	1
MSTRG.16912.1	25.7657	2.97021	48.5612	16.3494	4.03117	0.353167	1
MSTRG.15370.1	72.1085	25.4245	118.793	4.67236	2.22415	0.354018	1
MSTRG.9260.1	4204.02	2668.03	5740.02	2.15141	1.10528	0.354064	1
MSTRG.4097.1	219.171	324.892	113.451	0.349195	-1.51789	0.354711	1
MSTRG.11371.1	22.3139	1.9413	42.6865	21.9886	4.45869	0.355862	1
MSTRG.733.1	67.7762	23.208	112.344	4.84076	2.27523	0.357999	1
MSTRG.7738.1	226.874	120.537	333.21	2.76437	1.46695	0.359708	1
MSTRG.2989.1	115.157	51.3004	179.013	3.48951	1.80302	0.361106	1
MSTRG.15914.1	129.847	200.152	59.5421	0.297484	-1.74912	0.361248	1
MSTRG.10505.1	128.685	60.2447	197.125	3.27208	1.71021	0.365035	1
MSTRG.20330.1	411.121	239.153	583.088	2.43814	1.28578	0.365811	1
MSTRG.13686.1	131.624	62.3463	200.901	3.22234	1.68811	0.366841	1
MSTRG.16065.1	122.33	188.988	55.6712	0.294575	-1.76329	0.367598	1
MSTRG.7246.1	2400.8	3270.47	1531.14	0.46817	-1.09489	0.370648	1
MSTRG.14861.1	518.559	727.147	309.97	0.426282	-1.23012	0.372249	1
MSTRG.12348.1	211.305	310.406	112.204	0.361476	-1.46803	0.372295	1
MSTRG.11645.1	186.696	96.7816	276.611	2.85809	1.51505	0.372503	1
MSTRG.3383.10	1840.45	2515.13	1165.77	0.463502	-1.10935	0.374136	1
MSTRG.1619.29	1767.99	1042.55	2493.44	2.39168	1.25803	0.374459	1
MSTRG.3560.32	39.9601	71.8891	8.03103	0.111714	-3.16212	0.375371	1
MSTRG.15641.3	1335.56	854.159	1816.97	2.1272	1.08895	0.376533	1
MSTRG.12936.10	519.488	315.481	723.495	2.29331	1.19743	0.376907	1
MSTRG.6982.1	22.0898	2.19178	41.9878	19.1569	4.25979	0.377563	1
MSTRG.18019.2	337.516	98.9037	576.129	5.82515	2.5423	0.379182	1
MSTRG.13597.5	518.863	314.522	723.205	2.29938	1.20125	0.379556	1
MSTRG.16439.1	10.8584	0	21.7168	Inf	Inf	0.381921	1
MSTRG.16303.1	2350.17	3179.71	1520.63	0.47823	-1.06422	0.384531	1
MSTRG.12972.2	155.703	233.093	78.313	0.335973	-1.57358	0.384612	1
MSTRG.15644.1	290.241	166.245	414.236	2.49171	1.31714	0.384828	1
MSTRG.9783.9	3114.16	4201.43	2026.89	0.482428	-1.05161	0.385953	1
MSTRG.12198.1	339.762	200.739	478.784	2.38511	1.25405	0.391043	1
MSTRG.19592.1	42.7662	11.6318	73.9005	6.35332	2.66751	0.392012	1
MSTRG.2575.1	270.297	154.928	385.667	2.48933	1.31576	0.392251	1
MSTRG.13058.1	50.6448	15.7925	85.4971	5.41379	2.43664	0.392331	1
MSTRG.455.1	159.571	82.834	236.308	2.85279	1.51237	0.392455	1
MSTRG.5514.1	154.917	80.0745	229.76	2.86932	1.52071	0.39274	1
MSTRG.837.1	177.947	94.9596	260.935	2.74785	1.45831	0.392951	1
MSTRG.4494.1	929.651	594.969	1264.33	2.12504	1.08749	0.393095	1
MSTRG.16651.1	20.4598	1.99812	38.9215	19.479	4.28385	0.394743	1
MSTRG.11369.14	717.62	458.157	977.084	2.13264	1.09264	0.394863	1
MSTRG.3037.1	620.548	388.933	852.163	2.19103	1.13161	0.395902	1
MSTRG.2031.3	879.072	562.475	1195.67	2.12573	1.08796	0.398571	1
MSTRG.13606.3	233.217	131.484	334.95	2.54745	1.34906	0.399564	1
MSTRG.8205.1	64.8325	24.2854	105.38	4.33923	2.11744	0.399686	1
MSTRG.6877.1	10.3436	0	20.6872	Inf	Inf	0.400441	1
MSTRG.2280.1	154.845	38.098	271.592	7.12877	2.83365	0.40606	1
MSTRG.3335.1	302.881	179.964	425.798	2.36601	1.24246	0.406125	1
MSTRG.6728.2	10.2127	0	20.4254	Inf	Inf	0.4065	1
MSTRG.10786.1	187.08	271.314	102.846	0.379066	-1.39948	0.411614	1
MSTRG.593.1	139.768	207.639	71.8959	0.346254	-1.5301	0.411955	1
MSTRG.137.1	42.6703	12.4212	72.9194	5.87057	2.5535	0.412104	1
MSTRG.11372.1	1768.42	1145.77	2391.07	2.08687	1.06134	0.412411	1
MSTRG.10573.1	435.584	601.137	270.031	0.4492	-1.15457	0.415903	1
MSTRG.13059.1	31.8705	7.13934	56.6016	7.92813	2.98698	0.420551	1
MSTRG.16394.1	33.3751	7.91238	58.8377	7.43616	2.89456	0.421431	1
MSTRG.841.1	6447.53	8508.15	4386.92	0.515614	-0.955635	0.423324	1
MSTRG.627.1	249.785	387.797	111.772	0.288223	-1.79474	0.423481	1
MSTRG.10129.1	848.921	1142.94	554.898	0.485499	-1.04246	0.423975	1
MSTRG.13831.1	71.2835	29.9005	112.667	3.76805	1.91382	0.424041	1
MSTRG.9642.1	124.076	63.8832	184.27	2.88447	1.52831	0.424392	1
MSTRG.8987.1	11.9708	0.249045	23.6926	95.1336	6.57188	0.425227	1
MSTRG.9609.2	26.7016	4.95619	48.447	9.77504	3.2891	0.426722	1
MSTRG.8768.1	132.498	69.804	195.193	2.79629	1.48352	0.42714	1
MSTRG.12977.1	991.299	1328.28	654.314	0.492601	-1.02151	0.427224	1
MSTRG.18440.1	294.692	179.199	410.186	2.28899	1.19471	0.428307	1
MSTRG.14635.13	295.707	86.1668	505.247	5.8636	2.55179	0.43122	1
MSTRG.15097.1	128.509	55.2036	201.815	3.65583	1.8702	0.431662	1
MSTRG.9061.1	150.613	219.299	81.926	0.373581	-1.42051	0.433242	1
MSTRG.10038.1	71.8939	30.8961	112.892	3.65392	1.86945	0.433515	1
MSTRG.5627.1	45.1914	14.7806	75.6021	5.11494	2.35472	0.433799	1
MSTRG.8824.1	429.902	274.278	585.526	2.13479	1.09409	0.434026	1
MSTRG.9556.1	103.343	156.203	50.484	0.323196	-1.62952	0.434051	1
MSTRG.2535.1	85.0208	39.3159	130.726	3.32501	1.73336	0.434126	1
MSTRG.11697.1	95.1177	46.0545	144.181	3.13066	1.64647	0.435366	1
MSTRG.3560.18	445.613	145.686	745.54	5.11744	2.35542	0.438274	1
MSTRG.1887.2	56.8389	21.9159	91.762	4.18701	2.06592	0.438588	1
MSTRG.14422.1	43490.2	30338.8	56641.5	1.86696	0.900694	0.438987	1
MSTRG.16420.1	296.335	410.978	181.693	0.442099	-1.17756	0.439708	1
MSTRG.14888.1	244.217	342.474	145.96	0.426193	-1.23042	0.440001	1
MSTRG.13252.1	260.014	158.593	361.436	2.27901	1.18841	0.440913	1
MSTRG.136.1	8902.09	6204.73	11599.4	1.86945	0.902615	0.441449	1
MSTRG.13683.11	394.377	252.94	535.814	2.11835	1.08294	0.44465	1
MSTRG.19841.1	277.59	385.247	169.934	0.441103	-1.18081	0.444778	1
MSTRG.13565.44	93.7722	46.1849	141.36	3.06073	1.61388	0.444781	1
MSTRG.13372.1	48.2165	17.1565	79.2765	4.62079	2.20814	0.445393	1
MSTRG.9209.1	51.84	19.2223	84.4577	4.39374	2.13545	0.446031	1
MSTRG.6961.2	9.26862	0	18.5372	Inf	Inf	0.447017	1
MSTRG.188.1	9.26862	0	18.5372	Inf	Inf	0.447017	1
MSTRG.10068.1	12.705	0.500969	24.9091	49.7218	5.63581	0.447223	1
MSTRG.11220.1	27.1398	5.68336	48.5963	8.55062	3.09603	0.448634	1
MSTRG.4858.1	30.9396	7.6405	54.2387	7.09885	2.82758	0.452321	1
MSTRG.1647.13	1289.32	1697.35	881.295	0.519218	-0.945587	0.452551	1
MSTRG.14232.6	50.7561	82.914	18.5982	0.224307	-2.15646	0.453798	1
MSTRG.10461.1	293.407	404.646	182.168	0.450192	-1.15139	0.45448	1
MSTRG.7793.1	2228.6	1545.17	2912.03	1.88461	0.914265	0.456118	1
MSTRG.16395.8	3977.06	5172.68	2781.44	0.537718	-0.895079	0.456678	1
MSTRG.9556.2	230.733	322.065	139.401	0.432835	-1.20811	0.456911	1
MSTRG.20441.2	9.0006	0	18.0012	Inf	Inf	0.458058	1
MSTRG.2584.2	19.1935	2.4678	35.9193	14.5552	3.86346	0.458855	1
MSTRG.20166.1	1841.91	2404.69	1279.14	0.531937	-0.910673	0.46115	1
MSTRG.12484.1	203.057	284.637	121.478	0.426781	-1.22843	0.461449	1
MSTRG.19558.1	8.8764	0	17.7528	Inf	Inf	0.461958	1
MSTRG.6670.1	21.4383	3.44915	39.4275	11.4311	3.51489	0.46223	1
MSTRG.6439.1	171.384	242.624	100.145	0.412757	-1.27664	0.463707	1
MSTRG.217.1	282.141	387.13	177.152	0.457603	-1.12783	0.463754	1
MSTRG.8961.1	142.952	81.6894	204.215	2.49989	1.32187	0.464117	1
MSTRG.17369.2	12.4942	24.5657	0.422686	0.0172063	-5.86092	0.464475	1
MSTRG.14474.1	4083.09	5289.84	2876.35	0.54375	-0.878985	0.468177	1
MSTRG.11287.1	2238.95	1579.19	2898.7	1.83556	0.876224	0.468673	1
MSTRG.16662.1	204.505	285.164	123.845	0.434294	-1.20326	0.468918	1
MSTRG.3259.3	630.905	1049.03	212.783	0.202838	-2.3016	0.469153	1
MSTRG.2981.3	105.974	155.904	56.0448	0.359483	-1.476	0.469304	1
MSTRG.7848.1	14.2404	0.97065	27.5101	28.342	4.82487	0.469324	1
MSTRG.214.1	73.822	35.0896	112.554	3.20763	1.68151	0.470383	1
MSTRG.7074.1	671.486	458.829	884.142	1.92695	0.946321	0.47161	1
MSTRG.2264.1	301.335	409.194	193.476	0.472821	-1.08063	0.473233	1
MSTRG.9106.1	34.5962	59.0129	10.1796	0.172497	-2.53536	0.474927	1
MSTRG.13190.1	752.887	518.437	987.338	1.90445	0.929376	0.475497	1
MSTRG.16424.1	455.611	607.815	303.407	0.499176	-1.00238	0.477812	1
MSTRG.8570.1	14238.8	18251.1	10226.4	0.560319	-0.83568	0.480025	1
MSTRG.18858.1	296.064	192.277	399.851	2.07956	1.05628	0.480654	1
MSTRG.10319.1	65.4897	101.077	29.9027	0.295842	-1.7571	0.483106	1
MSTRG.421.1	156.072	93.6338	218.511	2.33368	1.2226	0.48407	1
MSTRG.3454.1	657.917	454.512	861.322	1.89505	0.922235	0.484135	1
MSTRG.12030.6	273.226	176.425	370.026	2.09736	1.06857	0.484648	1
MSTRG.15135.1	8.39801	0	16.796	Inf	Inf	0.486116	1
MSTRG.16817.1	190.602	263.89	117.315	0.444562	-1.16954	0.490244	1
MSTRG.10291.1	97.419	142.951	51.8872	0.362972	-1.46207	0.490274	1
MSTRG.9266.1	81.115	121.576	40.6539	0.334391	-1.58039	0.49188	1
MSTRG.5641.5	46.1751	17.9888	74.3613	4.13375	2.04745	0.492756	1
MSTRG.10138.1	104.126	57.1516	151.101	2.64386	1.40265	0.493021	1
MSTRG.17727.1	188.561	117.294	259.827	2.21517	1.14742	0.493139	1
MSTRG.8576.1	148.138	208.608	87.6674	0.420248	-1.25069	0.493284	1
MSTRG.8573.1	2884.02	3696.59	2071.46	0.56037	-0.835549	0.493372	1
MSTRG.3916.5	372.707	605.928	139.486	0.230203	-2.11902	0.494154	1
MSTRG.2339.1	1491.29	1067.42	1915.16	1.7942	0.84334	0.495134	1
MSTRG.3775.11	682.446	890.194	474.699	0.533253	-0.907108	0.495921	1
MSTRG.19019.1	150.296	210.706	89.8857	0.426594	-1.22906	0.498733	1
MSTRG.6572.8	290.077	389.923	190.23	0.487866	-1.03544	0.498764	1
MSTRG.66.24	1285.39	925.857	1644.92	1.77664	0.829153	0.499001	1
MSTRG.6453.1	509.035	667.845	350.226	0.524411	-0.93123	0.499675	1
MSTRG.8968.6	880.971	1139.37	622.568	0.546411	-0.87194	0.499694	1
MSTRG.3770.1	159.694	222.622	96.7667	0.434669	-1.20201	0.501331	1
MSTRG.19867.2	8.02157	0	16.0431	Inf	Inf	0.501788	1
MSTRG.3721.1	50.929	21.8301	80.0279	3.66595	1.87419	0.501941	1
MSTRG.15921.1	116.137	165.781	66.4926	0.401087	-1.31801	0.50468	1
MSTRG.20121.1	450.521	311.379	589.663	1.89371	0.921217	0.506444	1
MSTRG.13229.1	7.97532	0	15.9506	Inf	Inf	0.506471	1
MSTRG.14556.3	104.375	58.5955	150.154	2.56255	1.35758	0.507858	1
MSTRG.1078.1	191.688	122.102	261.274	2.1398	1.09747	0.51043	1
MSTRG.2743.1	3957.15	2921.34	4992.96	1.70913	0.773264	0.511046	1
MSTRG.16164.1	388.382	510.954	265.811	0.520225	-0.942792	0.511192	1
MSTRG.8004.1	628.096	444.465	811.727	1.8263	0.868925	0.511372	1
MSTRG.545.1	273.806	182.959	364.654	1.9931	0.995013	0.511873	1
MSTRG.19744.1	7.81048	0	15.621	Inf	Inf	0.512165	1
MSTRG.2561.1	28.139	8.14866	48.1294	5.90642	2.56228	0.512581	1
MSTRG.4533.1	98.2159	141.904	54.5277	0.384258	-1.37985	0.512967	1
MSTRG.7302.1	96.2638	54.2607	138.267	2.5482	1.34948	0.513725	1
MSTRG.18822.1	391.285	514.525	268.046	0.520958	-0.940762	0.514775	1
MSTRG.7794.1	1141.6	828.879	1454.31	1.75455	0.811104	0.515897	1
MSTRG.18111.1	18.5166	3.20568	33.8276	10.5524	3.3995	0.516092	1
MSTRG.9855.1	445.903	312.101	579.704	1.85742	0.893303	0.518244	1
MSTRG.9055.1	2391.2	3028.62	1753.79	0.579072	-0.788185	0.518845	1
MSTRG.816.1	19.1857	34.975	3.39632	0.0971071	-3.36428	0.520892	1
MSTRG.3560.7	54.9979	25.8082	84.1876	3.26204	1.70578	0.52098	1
MSTRG.14472.1	66.6957	33.4702	99.9213	2.98538	1.57791	0.521921	1
MSTRG.8969.1	192.139	260.622	123.655	0.47446	-1.07564	0.524618	1
MSTRG.10167.1	83.3463	45.7792	120.913	2.64123	1.40121	0.526837	1
MSTRG.18141.1	527.702	228.126	827.278	3.62641	1.85854	0.528087	1
MSTRG.16205.1	91.0805	51.4967	130.664	2.53733	1.34331	0.528471	1
MSTRG.3007.1	338.259	234.467	442.051	1.88534	0.914826	0.529388	1
MSTRG.18172.2	9.21226	0.249045	18.1755	72.9806	6.18944	0.529448	1
MSTRG.10207.1	129.292	79.5177	179.067	2.25192	1.17115	0.530547	1
MSTRG.15115.1	124.635	173.793	75.4764	0.434289	-1.20327	0.531512	1
MSTRG.2602.1	40.3007	16.3212	64.2802	3.93844	1.97762	0.531837	1
MSTRG.20441.1	7.42099	0	14.842	Inf	Inf	0.532361	1
MSTRG.8476.2	170.533	232.044	109.022	0.469833	-1.08978	0.533485	1
MSTRG.14232.3	451.435	319.479	583.391	1.82607	0.86874	0.534652	1
MSTRG.386.2	16.8104	2.7119	30.9089	11.3975	3.51065	0.534867	1
MSTRG.1484.2	1924.1	1442.38	2405.82	1.66795	0.738078	0.537055	1
MSTRG.3560.5	2977.44	3731.91	2222.96	0.595663	-0.747432	0.53787	1
MSTRG.262.1	9.02441	0.242662	17.8062	73.3783	6.19728	0.537959	1
MSTRG.12598.2	70.5544	104.103	37.0057	0.355472	-1.49219	0.538542	1
MSTRG.4906.1	14.7552	1.97897	27.5314	13.912	3.79825	0.539968	1
MSTRG.11856.1	309.832	215.68	403.984	1.87307	0.905404	0.540299	1
MSTRG.7500.1	266.64	351.526	181.755	0.517045	-0.951639	0.540507	1
MSTRG.3560.2	2994.77	2249.75	3739.79	1.66231	0.733189	0.542082	1
MSTRG.15368.3	7.17719	0	14.3544	Inf	Inf	0.544545	1
MSTRG.8611.1	621.793	791.621	451.965	0.570936	-0.8086	0.547345	1
MSTRG.8654.1	38.2905	15.7025	60.8784	3.87699	1.95494	0.549502	1
MSTRG.327.1	7.11313	0	14.2263	Inf	Inf	0.55029	1
MSTRG.665.1	115.427	159.987	70.8675	0.442958	-1.17476	0.552	1
MSTRG.4348.1	92.5096	54.5171	130.502	2.39378	1.25929	0.55212	1
MSTRG.15238.1	411.35	528.238	294.462	0.557441	-0.843108	0.552769	1
MSTRG.9630.1	227.814	300.631	154.997	0.515574	-0.95575	0.553631	1
MSTRG.2323.1	101.819	142.836	60.8017	0.425674	-1.23218	0.554256	1
MSTRG.5610.1	1713.88	1296.97	2130.79	1.6429	0.716245	0.555025	1
MSTRG.16800.3	16.5601	2.94324	30.1769	10.253	3.35797	0.556995	1
MSTRG.16663.1	225.258	297.168	153.348	0.516031	-0.95447	0.557014	1
MSTRG.20160.1	166.583	223.884	109.282	0.48812	-1.03469	0.557101	1
MSTRG.17454.1	339.378	242.477	436.279	1.79926	0.847401	0.557751	1
MSTRG.9948.2	6.86813	0	13.7363	Inf	Inf	0.562903	1
MSTRG.1451.2	457.817	335.398	580.235	1.72999	0.790763	0.564203	1
MSTRG.8371.2	446.711	318.943	574.478	1.80119	0.848951	0.566544	1
MSTRG.13276.2	6.76297	0	13.5259	Inf	Inf	0.566891	1
MSTRG.6681.10	1590.63	1212.58	1968.67	1.62354	0.699145	0.567309	1
MSTRG.10124.1	1024.28	774.535	1274.03	1.64489	0.717992	0.567591	1
MSTRG.16091.1	109.61	151.228	67.9928	0.449605	-1.15327	0.569555	1
MSTRG.2981.1	115.632	158.464	72.8008	0.459416	-1.12213	0.569713	1
MSTRG.2338.1	847.406	1062.72	632.092	0.594787	-0.749556	0.570349	1
MSTRG.2328.1	131.289	85.3947	177.184	2.07488	1.05303	0.570494	1
MSTRG.6180.1	9.43753	0.485325	18.3897	37.8916	5.24381	0.57072	1
MSTRG.15927.1	54.9778	81.9718	27.9838	0.341383	-1.55054	0.571038	1
MSTRG.3560.33	321.706	233.164	410.247	1.75948	0.815148	0.571414	1
MSTRG.19563.1	5005.7	6156.43	3854.96	0.626169	-0.675376	0.57384	1
MSTRG.11858.1	16.4169	3.23202	29.6018	9.15891	3.19518	0.573888	1
MSTRG.4987.1	233.947	304.795	163.099	0.535111	-0.90209	0.575165	1
MSTRG.66.16	216.87	283.525	150.215	0.529813	-0.916445	0.576046	1
MSTRG.7026.1	93.3664	130.199	56.5342	0.434215	-1.20352	0.576216	1
MSTRG.7934.1	146.657	197.001	96.313	0.488896	-1.0324	0.576252	1
MSTRG.6802.2	232.355	301.574	163.137	0.540952	-0.886428	0.576646	1
MSTRG.12231.1	66.3777	37.1114	95.6439	2.57721	1.36581	0.576787	1
MSTRG.18291.1	75.5251	107.736	43.3143	0.402041	-1.31459	0.577524	1
MSTRG.7730.9	70.6258	106.591	34.6602	0.325169	-1.62074	0.577699	1
MSTRG.11535.3	6.55163	0	13.1033	Inf	Inf	0.578546	1
MSTRG.8663.1	12.3441	1.46874	23.2194	15.8091	3.98268	0.578825	1
MSTRG.7237.1	6.54441	0	13.0888	Inf	Inf	0.578827	1
MSTRG.8778.1	1553.72	1917.62	1189.81	0.620459	-0.688592	0.57914	1
MSTRG.6573.1	1592.7	1966.31	1219.09	0.619988	-0.689688	0.580235	1
MSTRG.1871.1	908.822	1128.66	688.979	0.610438	-0.712084	0.580341	1
MSTRG.3776.1	104.47	151.672	57.2688	0.377583	-1.40513	0.580596	1
MSTRG.10123.1	561.484	421.321	701.648	1.66535	0.73583	0.582596	1
MSTRG.8572.1	2273.97	2797.66	1750.28	0.625621	-0.676639	0.585403	1
MSTRG.3560.29	2411.53	1877.69	2945.37	1.56861	0.649491	0.586394	1
MSTRG.10523.1	247.936	319.71	176.163	0.551009	-0.859853	0.586863	1
MSTRG.8588.2	68.4293	39.6978	97.1607	2.4475	1.29131	0.588249	1
MSTRG.16728.1	27.8378	10.3658	45.3099	4.3711	2.128	0.588976	1
MSTRG.16064.1	463.172	581.961	344.382	0.591761	-0.756912	0.588979	1
MSTRG.6544.1	109.437	70.7979	148.077	2.09154	1.06457	0.589983	1
MSTRG.3456.2	131.637	80.7746	182.499	2.25936	1.17591	0.590019	1
MSTRG.18284.2	141.837	96.0932	187.581	1.95207	0.965005	0.590783	1
MSTRG.3390.2	50.8119	26.6207	75.0031	2.81747	1.4944	0.591723	1
MSTRG.11930.1	19.6627	5.40178	33.9236	6.28008	2.65078	0.592069	1
MSTRG.16393.1	3232.55	2531.78	3933.32	1.55358	0.635592	0.592166	1
MSTRG.9272.1	229.64	296.83	162.451	0.547286	-0.869634	0.592215	1
MSTRG.8469.1	317.983	404.302	231.664	0.572996	-0.803402	0.59334	1
MSTRG.14830.1	321.87	237.132	406.607	1.71469	0.777944	0.594502	1
MSTRG.19855.1	261.748	190.067	333.43	1.75428	0.81088	0.594802	1
MSTRG.18284.1	516.36	389.562	643.157	1.65097	0.723317	0.594997	1
MSTRG.2231.1	3141.83	3830	2453.66	0.640641	-0.642411	0.595812	1
MSTRG.9478.1	47.1189	70.5447	23.693	0.335859	-1.57407	0.596261	1
MSTRG.16572.1	1219.26	1496.95	941.559	0.628983	-0.668907	0.597354	1
MSTRG.10471.1	10.3739	1.00194	19.7459	19.7077	4.30069	0.600511	1
MSTRG.8571.1	6577.91	7948.22	5207.61	0.655192	-0.610011	0.60173	1
MSTRG.9781.1	6.14577	0	12.2915	Inf	Inf	0.601841	1
MSTRG.2282.1	6.12894	0	12.2579	Inf	Inf	0.602516	1
MSTRG.15995.1	6.1277	0	12.2554	Inf	Inf	0.602566	1
MSTRG.519.1	184.435	239.398	129.472	0.540824	-0.886769	0.603357	1
MSTRG.16463.1	678.518	838.74	518.295	0.617944	-0.694451	0.603418	1
MSTRG.1647.4	63.3926	36.8672	89.9179	2.43897	1.28627	0.605266	1
MSTRG.15530.1	143.239	188.532	97.946	0.519519	-0.944753	0.606113	1
MSTRG.9823.1	21.5214	6.8137	36.2291	5.31709	2.41064	0.606307	1
MSTRG.12499.1	586.833	726.432	447.235	0.61566	-0.699795	0.607091	1
MSTRG.7004.1	29.2614	12.0552	46.4675	3.85458	1.94657	0.609022	1
MSTRG.4246.1	8.487	0.485325	16.4887	33.9745	5.08638	0.609626	1
MSTRG.15653.1	142.238	187.265	97.2119	0.519114	-0.945876	0.610451	1
MSTRG.12936.12	395.075	493.437	296.714	0.60132	-0.733795	0.610799	1
MSTRG.9609.5	683.199	528.946	837.452	1.58325	0.662886	0.611405	1
MSTRG.18022.1	20289.6	24473.7	16105.4	0.658067	-0.603693	0.611459	1
MSTRG.657.1	20.1253	6.19729	34.0533	5.49487	2.45809	0.611635	1
MSTRG.14394.1	78.9065	49.4073	108.406	2.19412	1.13365	0.611773	1
MSTRG.16165.1	118.452	80.0454	156.859	1.95962	0.970577	0.611993	1
MSTRG.11341.20	73.5433	45.7063	101.38	2.21808	1.14931	0.612316	1
MSTRG.8059.1	5.9176	0	11.8352	Inf	Inf	0.614833	1
MSTRG.7221.1	14.9662	3.2563	26.6761	8.19216	3.03424	0.614992	1
MSTRG.4853.1	394.874	491.406	298.341	0.607117	-0.719954	0.616869	1
MSTRG.3594.1	1061.55	834.845	1288.25	1.5431	0.625832	0.617109	1
MSTRG.11376.1	2235.02	2703.29	1766.76	0.653557	-0.613615	0.618421	1
MSTRG.30.1	165.763	118.116	213.411	1.80679	0.853426	0.619166	1
MSTRG.14948.1	6.63785	13.2757	0	0	-Inf	0.619926	1
MSTRG.15813.1	355.452	270.238	440.666	1.63066	0.705453	0.621313	1
MSTRG.880.1	30.1283	13.0079	47.2486	3.63229	1.86088	0.621646	1
MSTRG.11230.1	71.0479	98.9818	43.1139	0.435574	-1.19901	0.621978	1
MSTRG.16661.1	1008.59	1226.19	790.986	0.645078	-0.632453	0.622159	1
MSTRG.11774.1	1220.8	1483.57	958.038	0.645767	-0.630915	0.623308	1
MSTRG.11792.1	216.763	158.264	275.261	1.73925	0.798468	0.623651	1
MSTRG.20533.1	7.21342	0.242662	14.1842	58.4523	5.86919	0.624221	1
MSTRG.4095.4	66.5378	93.3899	39.6857	0.424946	-1.23465	0.624829	1
MSTRG.19641.1	161.628	208.834	114.422	0.547911	-0.867988	0.625481	1
MSTRG.1455.1	2193.8	2644.12	1743.48	0.659378	-0.600821	0.626489	1
MSTRG.10907.1	27.0849	11.2718	42.898	3.80578	1.92819	0.626837	1
MSTRG.15377.1	1289.63	1559.94	1019.32	0.653435	-0.613883	0.626869	1
MSTRG.19409.1	257.879	193.173	322.584	1.66992	0.739778	0.628776	1
MSTRG.2217.1	474.596	367.522	581.671	1.58268	0.662374	0.628827	1
MSTRG.8245.1	214.74	272.173	157.307	0.577968	-0.790938	0.630481	1
MSTRG.7793.2	73.5497	44.0761	103.023	2.3374	1.2249	0.630975	1
MSTRG.13023.1	104.483	70.8482	138.118	1.94949	0.963098	0.631076	1
MSTRG.2981.2	280.975	352.071	209.879	0.596128	-0.746306	0.63196	1
MSTRG.17369.3	6.38736	12.7747	0	0	-Inf	0.633275	1
MSTRG.221.1	49.178	27.9944	70.3616	2.51342	1.32965	0.633446	1
MSTRG.9381.1	671.564	527.984	815.144	1.54388	0.626561	0.63477	1
MSTRG.13601.1	48.9735	27.657	70.29	2.54149	1.34567	0.63633	1
MSTRG.2893.1	526.136	643.027	409.245	0.636436	-0.651914	0.637123	1
MSTRG.15813.3	140.108	100.055	180.161	1.80062	0.848493	0.63839	1
MSTRG.12501.1	24.1683	38.9847	9.352	0.239889	-2.05956	0.638635	1
MSTRG.3832.1	71.4049	45.8132	96.9966	2.11722	1.08217	0.641196	1
MSTRG.20163.1	6.22901	12.458	0	0	-Inf	0.641691	1
MSTRG.5706.1	86.6753	116.349	57.002	0.489924	-1.02937	0.643306	1
MSTRG.12130.4	2423.26	2893.16	1953.36	0.675164	-0.566689	0.643482	1
MSTRG.2221.1	376.158	461.194	291.123	0.631239	-0.663742	0.644312	1
MSTRG.13312.1	174.856	222.186	127.527	0.573965	-0.800965	0.645439	1
MSTRG.14168.1	422.522	516.51	328.534	0.636065	-0.652754	0.645934	1
MSTRG.12038.1	361.779	443.997	279.561	0.629647	-0.667385	0.64823	1
MSTRG.1392.2	234.541	177.782	291.3	1.63852	0.712393	0.648869	1
MSTRG.4346.2	6.68454	0.250485	13.1186	52.3728	5.71075	0.649037	1
MSTRG.13685.1	341.612	265.853	417.371	1.56993	0.650702	0.650092	1
MSTRG.11428.1	5206.6	6175.41	4237.8	0.686237	-0.543221	0.650616	1
MSTRG.17408.1	81.2835	109.338	53.229	0.48683	-1.03851	0.650907	1
MSTRG.1399.1	336.144	412.656	259.632	0.629173	-0.668471	0.650966	1
MSTRG.2522.1	23.4544	37.6151	9.29361	0.247071	-2.017	0.653054	1
MSTRG.1030.1	7.72564	15.0291	0.422188	0.0280914	-5.15373	0.653517	1
MSTRG.8118.2	233.183	290.546	175.821	0.60514	-0.72466	0.653653	1
MSTRG.7869.1	154.213	113.432	194.994	1.71904	0.7816	0.653657	1
MSTRG.4147.1	508.851	617.752	399.95	0.647428	-0.627208	0.65511	1
MSTRG.6781.1	5.9739	11.9478	0	0	-Inf	0.655674	1
MSTRG.3865.1	105.579	138.062	73.0953	0.529438	-0.917466	0.656144	1
MSTRG.7238.1	8.19066	0.751454	15.6299	20.7995	4.37848	0.657538	1
MSTRG.18057.5	345.738	271.951	419.526	1.54265	0.62541	0.658876	1
MSTRG.16551.1	2768.26	3277	2259.51	0.689504	-0.536368	0.660157	1
MSTRG.16402.1	1194.76	972.383	1417.14	1.45739	0.543386	0.66019	1
MSTRG.14376.1	67.1049	91.2787	42.9311	0.47033	-1.08825	0.660994	1
MSTRG.134.1	107.105	75.774	138.437	1.82697	0.869451	0.661304	1
MSTRG.13598.2	75.0037	101.034	48.9738	0.484728	-1.04475	0.663411	1
MSTRG.9854.1	7.36361	0.500969	14.2263	28.3974	4.82769	0.663635	1
MSTRG.12177.1	3444.89	4066.27	2823.51	0.694375	-0.526213	0.663966	1
MSTRG.3560.9	127.445	93.406	161.483	1.72883	0.789799	0.664276	1
MSTRG.16697.1	65.112	42.4285	87.7955	2.06926	1.04911	0.664284	1
MSTRG.17481.2	244.128	187.517	300.74	1.6038	0.681497	0.664834	1
MSTRG.6819.1	8.04531	0.727987	15.3626	21.1029	4.39937	0.665172	1
MSTRG.8723.1	11.2989	2.24861	20.3492	9.04972	3.17787	0.667073	1
MSTRG.6969.1	252.314	309.982	194.646	0.627926	-0.671332	0.668629	1
MSTRG.5980.8	209.048	259.444	158.653	0.611512	-0.709547	0.668675	1
MSTRG.519.2	122.664	157.486	87.842	0.557776	-0.842242	0.669507	1
MSTRG.15782.1	347.54	275.501	419.579	1.52297	0.606885	0.671902	1
MSTRG.15147.1	236.598	183.769	289.428	1.57495	0.655309	0.673839	1
MSTRG.10380.1	26.4984	40.7103	12.2866	0.301805	-1.72831	0.675632	1
MSTRG.17369.1	79.1119	104.561	53.6631	0.513225	-0.962337	0.67835	1
MSTRG.4931.1	6.14726	0.250485	12.044	48.0829	5.58745	0.679122	1
MSTRG.10085.2	4.86089	0	9.72177	Inf	Inf	0.679747	1
MSTRG.16097.1	4.86089	0	9.72177	Inf	Inf	0.679747	1
MSTRG.7502.1	93.4251	121.466	65.3845	0.538295	-0.89353	0.680033	1
MSTRG.20134.1	543.076	647.804	438.349	0.676668	-0.563479	0.681829	1
MSTRG.11938.1	372.691	296.125	449.258	1.51712	0.60134	0.682008	1
MSTRG.19938.1	14.2316	4.18559	24.2776	5.80029	2.53613	0.682078	1
MSTRG.17240.2	4604.19	3845.27	5363.12	1.39473	0.479987	0.682307	1
MSTRG.13092.1	6.04949	0.250485	11.8485	47.3022	5.56384	0.682374	1
MSTRG.14354.5	163.006	124.362	201.651	1.62148	0.697311	0.682402	1
MSTRG.12861.1	1405.66	1651.72	1159.6	0.70206	-0.510335	0.684286	1
MSTRG.11112.1	10.3182	1.99812	18.6382	9.32789	3.22155	0.684562	1
MSTRG.12294.1	43.7894	61.572	26.0069	0.422383	-1.24338	0.684755	1
MSTRG.12182.1	579.635	475.053	684.216	1.44029	0.526363	0.684831	1
MSTRG.14346.1	69.8655	92.9824	46.7487	0.502769	-0.992031	0.684926	1
MSTRG.12176.1	126.962	94.6996	159.224	1.68136	0.74963	0.686682	1
MSTRG.19659.1	30.0318	15.8396	44.2239	2.79199	1.48129	0.687807	1
MSTRG.11567.2	4.70199	0	9.40397	Inf	Inf	0.691057	1
MSTRG.17673.2	58.9291	39.3253	78.5329	1.99701	0.997841	0.691445	1
MSTRG.1331.2	18.1191	29.3406	6.89758	0.235087	-2.08873	0.69203	1
MSTRG.10621.1	115.878	86.1862	145.57	1.68902	0.756187	0.692407	1
MSTRG.69.1	260.178	315.454	204.901	0.649544	-0.622502	0.692978	1
MSTRG.16092.1	19.1891	30.6868	7.69147	0.250645	-1.99628	0.694807	1
MSTRG.19382.1	132.987	166.592	99.3828	0.596565	-0.745249	0.695363	1
MSTRG.5958.1	14.0309	4.41486	23.647	5.35623	2.42122	0.696611	1
MSTRG.7163.1	157.391	120.941	193.842	1.60278	0.680577	0.697195	1
MSTRG.538.1	1509.44	1758.86	1260.02	0.716385	-0.481194	0.69791	1
MSTRG.10486.1	5.22995	10.4599	0	0	-Inf	0.697976	1
MSTRG.10225.1	7.88144	0.986294	14.7766	14.9819	3.90515	0.698141	1
MSTRG.5499.1	196.378	240.631	152.125	0.632191	-0.661567	0.699007	1
MSTRG.9521.1	20.715	32.5423	8.88775	0.273114	-1.87243	0.700768	1
MSTRG.9984.1	85.8129	61.8234	109.802	1.77606	0.828684	0.700947	1
MSTRG.1647.7	163.985	202.169	125.801	0.622256	-0.684421	0.70227	1
MSTRG.6862.1	2017.48	1699.62	2335.35	1.37404	0.458425	0.702356	1
MSTRG.12467.1	30.423	16.5795	44.2665	2.66995	1.41681	0.702418	1
MSTRG.17480.1	949.131	793.105	1105.16	1.39346	0.478666	0.703151	1
MSTRG.2429.1	5.09591	10.1918	0	0	-Inf	0.705184	1
MSTRG.20258.1	1029.81	1203.32	856.303	0.711617	-0.490828	0.705209	1
MSTRG.18586.1	82.4915	106.385	58.5977	0.550806	-0.860384	0.7056	1
MSTRG.814.1	147.435	181.797	113.074	0.621978	-0.685064	0.705842	1
MSTRG.1647.19	163.757	201.103	126.41	0.628581	-0.669828	0.705875	1
MSTRG.1023.1	2650.74	2245.18	3056.29	1.36126	0.444947	0.706462	1
MSTRG.2804.1	35.3807	20.9045	49.8569	2.38499	1.25398	0.706487	1
MSTRG.6263.1	53.3959	71.8377	34.9541	0.486571	-1.03928	0.70675	1
MSTRG.6172.1	4.43297	0	8.86595	Inf	Inf	0.70748	1
MSTRG.6119.1	263.215	212.26	314.171	1.48013	0.565722	0.708394	1
MSTRG.6793.1	51.5027	34.5562	68.4492	1.98081	0.986089	0.709602	1
MSTRG.3390.1	14.3861	4.97058	23.8015	4.78848	2.25957	0.709698	1
MSTRG.6442.1	26.9988	39.9113	14.0862	0.352937	-1.50252	0.711465	1
MSTRG.13684.6	29.5854	42.8325	16.3382	0.381443	-1.39046	0.714629	1
MSTRG.14473.1	242.39	290.02	194.761	0.671544	-0.574447	0.715924	1
MSTRG.6544.2	14.1068	4.93911	23.2744	4.71227	2.23642	0.716205	1
MSTRG.18139.1	136.911	168.516	105.306	0.624902	-0.678298	0.717773	1
MSTRG.15776.1	11.0422	2.99224	19.0921	6.38054	2.67368	0.719321	1
MSTRG.13962.1	282.508	231.069	333.947	1.44523	0.531294	0.720365	1
MSTRG.6218.1	42.7955	27.6684	57.9226	2.09346	1.06589	0.720491	1
MSTRG.3338.1	218.364	262.298	174.429	0.665005	-0.588564	0.720994	1
MSTRG.2871.7	75.5197	96.9942	54.0452	0.557201	-0.843732	0.721111	1
MSTRG.13599.1	13.212	22.1916	4.23228	0.190715	-2.39051	0.72248	1
MSTRG.6218.2	283.481	335.949	231.013	0.687642	-0.540271	0.724572	1
MSTRG.18230.1	74.5301	95.3748	53.6854	0.562888	-0.82908	0.726298	1
MSTRG.11786.4	62.3419	44.5791	80.1046	1.79691	0.845517	0.728097	1
MSTRG.16668.1	40.4416	55.3346	25.5487	0.461713	-1.11493	0.728129	1
MSTRG.16369.1	357.481	296.91	418.051	1.408	0.493652	0.729036	1
MSTRG.519.3	156.47	189.349	123.591	0.652714	-0.615477	0.730112	1
MSTRG.5897.2	215.188	173.548	256.829	1.47988	0.565479	0.730136	1
MSTRG.7830.1	6.58003	0.727987	12.4321	17.0773	4.09401	0.732064	1
MSTRG.2707.1	60.6968	42.9338	78.4599	1.82747	0.869844	0.733166	1
MSTRG.13808.1	1253.17	1073.15	1433.2	1.33551	0.417389	0.733696	1
MSTRG.13683.7	117.487	92.21	142.764	1.54824	0.630633	0.733995	1
MSTRG.1905.3	4.01079	0	8.02157	Inf	Inf	0.735796	1
MSTRG.19264.1	62.5922	44.9515	80.2328	1.78487	0.835821	0.736163	1
MSTRG.14635.11	319.074	374.75	263.397	0.702859	-0.508693	0.737024	1
MSTRG.7563.1	217.385	178.24	256.53	1.43924	0.525308	0.73825	1
MSTRG.2637.1	483.607	408.94	558.273	1.36517	0.449083	0.739073	1
MSTRG.9850.1	391.35	327.109	455.591	1.39278	0.477968	0.739574	1
MSTRG.3342.1	265.28	219.543	311.017	1.41665	0.502485	0.739708	1
MSTRG.698.1	74.4503	55.3798	93.5208	1.68872	0.755927	0.740059	1
MSTRG.3172.1	15.0527	24.1394	5.96609	0.247152	-2.01653	0.740157	1
MSTRG.12027.1	11.5247	3.71034	19.339	5.21221	2.38189	0.743083	1
MSTRG.14370.1	84.5665	105.781	63.3516	0.598891	-0.739634	0.744059	1
MSTRG.12362.1	66.7187	48.1958	85.2417	1.76865	0.822652	0.744394	1
MSTRG.14232.4	522.709	604.233	441.186	0.730158	-0.453719	0.744677	1
MSTRG.8612.1	163.672	195.762	131.581	0.672148	-0.57315	0.746379	1
MSTRG.18752.2	93.4345	115.339	71.5302	0.620175	-0.689253	0.746703	1
MSTRG.8371.1	1190.8	1027.95	1353.66	1.31685	0.397095	0.74781	1
MSTRG.2351.1	589.423	678.636	500.209	0.73708	-0.440107	0.747938	1
MSTRG.16590.1	216.343	255.203	177.482	0.695453	-0.523974	0.747942	1
MSTRG.14538.3	472.572	545.532	399.611	0.732516	-0.449067	0.749343	1
MSTRG.11508.1	24.8278	14.1031	35.5525	2.5209	1.33394	0.749427	1
MSTRG.15665.1	451.455	383.642	519.269	1.35353	0.436722	0.749881	1
MSTRG.16413.5	20784.2	23408.9	18159.6	0.775755	-0.366326	0.750321	1
MSTRG.3456.1	5.69072	10.9588	0.422686	0.0385706	-4.69635	0.750687	1
MSTRG.14232.2	706.467	808.966	603.969	0.746594	-0.421605	0.752361	1
MSTRG.6995.1	29.8857	18.5746	41.1969	2.21792	1.14921	0.753636	1
MSTRG.14738.2	97.5055	77.1493	117.862	1.52771	0.611369	0.753798	1
MSTRG.8394.1	10.0676	2.9943	17.141	5.72454	2.51716	0.754052	1
MSTRG.12598.1	1416.94	1232.56	1601.32	1.29918	0.377599	0.754446	1
MSTRG.11300.1	5724.02	6468.81	4979.23	0.769728	-0.37758	0.754734	1
MSTRG.1432.1	2752.81	2405.07	3100.56	1.28918	0.36645	0.756129	1
MSTRG.859.1	15.3038	6.89173	23.7159	3.44121	1.78292	0.757285	1
MSTRG.18023.1	26627.6	30004.9	23250.2	0.774881	-0.367954	0.758034	1
MSTRG.13757.1	44.2439	58.2669	30.221	0.518665	-0.947126	0.758124	1
MSTRG.16703.1	59.8061	76.2014	43.4108	0.569685	-0.811764	0.758249	1
MSTRG.14373.1	250.916	210.639	291.192	1.38242	0.467199	0.758631	1
MSTRG.6718.1	751.501	856.694	646.308	0.754421	-0.406558	0.759484	1
MSTRG.9766.2	48.6257	63.2002	34.0513	0.538784	-0.892221	0.759597	1
MSTRG.8453.7	6.50551	0.991238	12.0198	12.126	3.60004	0.761022	1
MSTRG.3560.28	124.212	99.4287	148.994	1.49851	0.583524	0.761423	1
MSTRG.13184.1	260.882	219.787	301.977	1.37395	0.458332	0.76145	1
MSTRG.7253.19	899.835	781.96	1017.71	1.30149	0.380161	0.761796	1
MSTRG.17088.1	146.909	175.264	118.554	0.676433	-0.563981	0.761873	1
MSTRG.9172.1	100.445	79.249	121.641	1.53492	0.618166	0.762032	1
MSTRG.186.1	115.795	93.2673	138.322	1.48307	0.568589	0.763726	1
MSTRG.10393.2	459.295	396.857	521.733	1.31466	0.394692	0.76431	1
MSTRG.9970.1	698.158	795.071	601.245	0.756215	-0.403132	0.764335	1
MSTRG.4837.1	4.12837	8.25673	0	0	-Inf	0.764386	1
MSTRG.19712.1	124.969	149.983	99.954	0.666435	-0.585463	0.764402	1
MSTRG.5618.2	50.2934	36.318	64.2689	1.76961	0.823435	0.764565	1
MSTRG.14573.3	297.197	343.244	251.151	0.731698	-0.450681	0.764831	1
MSTRG.12282.16	3.5886	0	7.17719	Inf	Inf	0.764894	1
MSTRG.9766.1	16.9388	8.51648	25.3611	2.97789	1.57429	0.76495	1
MSTRG.17672.1	153.883	182.341	125.424	0.687855	-0.539823	0.766951	1
MSTRG.17055.1	35.5366	47.6617	23.4115	0.491201	-1.02561	0.766985	1
MSTRG.19714.4	1461.16	1649.31	1273.02	0.771846	-0.373614	0.767371	1
MSTRG.19257.1	262.9	304.776	221.024	0.725201	-0.463547	0.767566	1
MSTRG.14345.1	9.23555	15.9112	2.55986	0.160884	-2.63591	0.76834	1
MSTRG.8588.1	103.071	125.047	81.0938	0.648505	-0.62481	0.768962	1
MSTRG.1456.1	24.5867	34.7328	14.4406	0.415761	-1.26617	0.770202	1
MSTRG.15453.1	102.704	124.13	81.2781	0.654781	-0.610916	0.770459	1
MSTRG.16585.1	11.3374	4.24097	18.4338	4.3466	2.11989	0.771001	1
MSTRG.66.22	1280.1	1441.6	1118.6	0.775943	-0.365977	0.771401	1
MSTRG.6218.3	16.1171	7.91839	24.3158	3.07079	1.61861	0.771469	1
MSTRG.13149.1	4.00776	8.01551	0	0	-Inf	0.771909	1
MSTRG.17125.1	243.607	282.665	204.549	0.723644	-0.466648	0.77204	1
MSTRG.4424.1	5.11146	0.485325	9.7376	20.0641	4.32654	0.773059	1
MSTRG.3047.1	1405.06	1235.38	1574.74	1.2747	0.350157	0.774401	1
MSTRG.7946.32	1130.6	994.585	1266.62	1.27352	0.348822	0.775826	1
MSTRG.3185.1	3.44879	0	6.89758	Inf	Inf	0.776352	1
MSTRG.211.1	323.599	269.405	377.792	1.40232	0.487816	0.777871	1
MSTRG.16824.1	16.4963	8.44671	24.5459	2.90597	1.53902	0.780656	1
MSTRG.12982.1	249.426	212.626	286.226	1.34615	0.428837	0.780707	1
MSTRG.1778.1	23.0914	32.5925	13.5903	0.416975	-1.26197	0.781514	1
MSTRG.10402.1	281.313	241.96	320.666	1.32528	0.406302	0.782735	1
MSTRG.11689.1	14.9425	7.40547	22.4795	3.03552	1.60194	0.784286	1
MSTRG.182.1	3397.62	3788.48	3006.75	0.793658	-0.333411	0.784859	1
MSTRG.4707.1	186.09	216.071	156.108	0.722487	-0.468957	0.784899	1
MSTRG.4396.1	608.731	687.227	530.235	0.771557	-0.374155	0.784987	1
MSTRG.4546.1	9.76976	3.49239	16.0471	4.59488	2.20003	0.785463	1
MSTRG.4289.1	173.181	146.214	200.149	1.36888	0.452999	0.786322	1
MSTRG.9896.1	316.359	361.821	270.897	0.748704	-0.417532	0.789375	1
MSTRG.3204.1	1490.45	1664.38	1316.51	0.790993	-0.338263	0.789423	1
MSTRG.6621.1	353.391	307.319	399.462	1.29983	0.37832	0.789714	1
MSTRG.12444.1	162.266	189.017	135.514	0.716939	-0.480078	0.790647	1
MSTRG.8575.1	16.3466	8.75914	23.9341	2.73247	1.45021	0.790884	1
MSTRG.7236.1	8.5452	2.72611	14.3643	5.26916	2.39757	0.791649	1
MSTRG.215.1	5.7689	0.97065	10.5671	10.8867	3.44449	0.792231	1
MSTRG.5427.2	39.2412	28.2967	50.1856	1.77355	0.826639	0.792574	1
MSTRG.8901.3	151.41	176.279	126.541	0.717847	-0.478253	0.792768	1
MSTRG.18171.3	69.3521	84.9496	53.7545	0.632781	-0.660222	0.793849	1
MSTRG.16303.2	807.94	907.101	708.779	0.781367	-0.355927	0.793854	1
MSTRG.15103.1	337.994	296.305	379.683	1.28139	0.357713	0.794822	1
MSTRG.4387.1	40.9061	52.5078	29.3043	0.558094	-0.84142	0.794902	1
MSTRG.639.4	622.973	550.46	695.486	1.26346	0.337383	0.795275	1
MSTRG.1647.12	626.362	705.403	547.32	0.775897	-0.366062	0.795297	1
MSTRG.2043.1	992.049	1105.68	878.42	0.794463	-0.331948	0.79868	1
MSTRG.7670.1	6.49856	1.50003	11.4971	7.66457	2.93821	0.799564	1
MSTRG.997.1	239.493	273.331	205.656	0.752405	-0.410419	0.800469	1
MSTRG.18057.3	3.54414	7.08828	0	0	-Inf	0.800633	1
MSTRG.15132.1	8.31335	14.0916	2.53512	0.179903	-2.47471	0.800741	1
MSTRG.9609.1	4.70417	8.98616	0.422188	0.046982	-4.41175	0.801021	1
MSTRG.14990.1	529.4	468.332	590.468	1.26079	0.334329	0.801873	1
MSTRG.16162.1	1040.47	930.996	1149.95	1.23518	0.304724	0.801964	1
MSTRG.13352.1	354.048	399.362	308.733	0.773066	-0.371337	0.803362	1
MSTRG.16937.1	49.9992	62.0742	37.9243	0.610952	-0.710869	0.804794	1
MSTRG.10643.1	69.8344	84.2897	55.3791	0.657009	-0.606015	0.805624	1
MSTRG.128.1	181.578	156.438	206.718	1.3214	0.402071	0.806358	1
MSTRG.3338.2	25.4232	34.3078	16.5387	0.482067	-1.0527	0.80699	1
MSTRG.296.2	9.29774	15.2061	3.3894	0.222898	-2.16555	0.807262	1
MSTRG.13281.1	63.2414	50.5144	75.9684	1.5039	0.588704	0.807386	1
MSTRG.15097.6	648.843	579.99	717.696	1.23743	0.307345	0.808299	1
MSTRG.16579.1	190.034	164.452	215.616	1.31111	0.390794	0.809577	1
MSTRG.49.1	3.37291	6.74582	0	0	-Inf	0.811974	1
MSTRG.12286.1	575.325	641.632	509.018	0.793318	-0.33403	0.812092	1
MSTRG.9325.1	36.4516	46.6458	26.2574	0.56291	-0.829023	0.812245	1
MSTRG.17047.1	9.96633	4.25824	15.6744	3.68096	1.88008	0.812284	1
MSTRG.15158.1	7.32257	2.2309	12.4142	5.56469	2.4763	0.812764	1
MSTRG.13685.2	290.228	327.223	253.233	0.773885	-0.36981	0.812849	1
MSTRG.16525.1	11.3547	17.5362	5.17318	0.295	-1.76121	0.813264	1
MSTRG.3107.1	32490.1	35661.4	29318.7	0.822142	-0.282541	0.813369	1
MSTRG.17114.1	56.6558	69.1822	44.1294	0.637873	-0.64866	0.813438	1
MSTRG.14556.2	295.221	333.427	257.015	0.77083	-0.375516	0.81473	1
MSTRG.20231.1	110.618	94.3592	126.877	1.34461	0.427191	0.821998	1
MSTRG.13484.1	208.207	183.013	233.401	1.27533	0.350866	0.823089	1
MSTRG.8372.1	1046.12	1151.36	940.886	0.817195	-0.291248	0.823274	1
MSTRG.1013.1	470.714	522.104	419.324	0.803144	-0.316269	0.824827	1
MSTRG.9504.1	94.6147	80.0487	109.181	1.36393	0.447767	0.826029	1
MSTRG.7159.1	121.52	139.675	103.366	0.740043	-0.434318	0.827939	1
MSTRG.6201.2	106.888	91.2178	122.557	1.34357	0.426069	0.831214	1
MSTRG.12874.1	22.2522	29.6307	14.8736	0.501968	-0.994334	0.83162	1
MSTRG.5858.1	31.6073	23.5026	39.712	1.68969	0.756759	0.831633	1
MSTRG.7947.1	53.5793	43.3982	63.7605	1.4692	0.555029	0.8318	1
MSTRG.9198.10	117.971	135.021	100.921	0.747442	-0.419966	0.831935	1
MSTRG.14573.1	401.791	361.759	441.823	1.22132	0.288437	0.832908	1
MSTRG.13409.1	12.7387	18.6481	6.82928	0.366219	-1.44922	0.83427	1
MSTRG.15663.1	132.175	115.127	149.223	1.29616	0.374247	0.834823	1
MSTRG.4812.1	23.2678	16.3286	30.207	1.84994	0.887481	0.835641	1
MSTRG.14428.1	25.2107	18.15	32.2715	1.77805	0.830292	0.83608	1
MSTRG.17911.1	20.1175	27.0116	13.2235	0.489548	-1.03048	0.83639	1
MSTRG.20156.1	181.335	203.367	159.303	0.783326	-0.352315	0.838023	1
MSTRG.1161.1	230.085	256.825	203.344	0.791759	-0.336866	0.838182	1
MSTRG.20015.1	847.67	773.089	922.251	1.19294	0.254525	0.83831	1
MSTRG.3553.1	43.6095	53.1316	34.0875	0.641566	-0.640329	0.839979	1
MSTRG.17525.1	53.3533	63.7736	42.9331	0.673212	-0.570867	0.840697	1
MSTRG.10636.1	48.0395	38.7396	57.3395	1.48013	0.565721	0.840786	1
MSTRG.17830.1	52.3434	62.6189	42.068	0.671809	-0.573877	0.840858	1
MSTRG.1647.9	1133.94	1235.3	1032.57	0.835888	-0.258618	0.841682	1
MSTRG.17346.1	230.911	256.784	205.039	0.79849	-0.324655	0.842178	1
MSTRG.18390.2	52.2324	62.475	41.9898	0.672105	-0.573241	0.842612	1
MSTRG.19441.1	18.7842	25.2092	12.3593	0.490269	-1.02835	0.842937	1
MSTRG.9957.1	50.3443	41.2258	59.4629	1.44237	0.528441	0.845315	1
MSTRG.10792.1	201.503	180.124	222.881	1.23738	0.307283	0.846908	1
MSTRG.6283.1	8.87194	4.19773	13.5462	3.22702	1.6902	0.847018	1
MSTRG.3731.1	24.0867	17.5203	30.653	1.74957	0.806998	0.847576	1
MSTRG.12485.7	569.432	523.576	615.288	1.17516	0.232863	0.847768	1
MSTRG.15798.1	7.20061	2.94818	11.453	3.88478	1.95783	0.852414	1
MSTRG.16982.1	173.878	193.827	153.928	0.794153	-0.332511	0.853027	1
MSTRG.18044.1	26.3412	19.9822	32.7001	1.63646	0.71058	0.853956	1
MSTRG.13313.1	16.5664	11.1053	22.0275	1.98352	0.988061	0.854163	1
MSTRG.10276.1	202.512	182.355	222.668	1.22107	0.288142	0.854289	1
MSTRG.18511.1	29.3028	36.5617	22.0439	0.602923	-0.729953	0.85483	1
MSTRG.399.1	34.874	27.7503	41.9977	1.51341	0.597803	0.855174	1
MSTRG.6563.1	27.9828	34.9269	21.0387	0.602364	-0.731292	0.856035	1
MSTRG.18218.2	14.8549	20.4217	9.28813	0.454816	-1.13664	0.857508	1
MSTRG.3770.2	49.6539	41.8231	57.4848	1.37447	0.458878	0.858831	1
MSTRG.7943.1	264.709	290.065	239.353	0.825171	-0.277235	0.860674	1
MSTRG.4374.1	37.9211	45.5545	30.2878	0.664869	-0.588857	0.862496	1
MSTRG.5262.1	7.66265	11.9478	3.3775	0.282688	-1.82272	0.863481	1
MSTRG.2235.2	75.2732	85.6204	64.9261	0.758302	-0.399156	0.867068	1
MSTRG.10961.1	5.94117	9.7689	2.11343	0.216342	-2.20861	0.867784	1
MSTRG.13684.5	12.4766	17.2944	7.65882	0.44285	-1.17511	0.868641	1
MSTRG.18057.2	80.3116	69.9465	90.6766	1.29637	0.374479	0.8687	1
MSTRG.1647.10	46.6055	54.7466	38.4644	0.702589	-0.509247	0.869471	1
MSTRG.6626.4	531.429	574.287	488.571	0.850744	-0.233203	0.869954	1
MSTRG.19305.1	56.9794	65.8979	48.0608	0.729322	-0.455371	0.87036	1
MSTRG.14989.1	533.944	575.848	492.041	0.854463	-0.22691	0.872295	1
MSTRG.17681.1	87.9103	78.246	97.5747	1.24703	0.318491	0.874274	1
MSTRG.8382.1	274.113	252.285	295.941	1.17304	0.230254	0.874968	1
MSTRG.4826.1	398.201	368.322	428.08	1.16224	0.216914	0.875058	1
MSTRG.15221.1	41.9095	35.3038	48.5152	1.37422	0.458612	0.876202	1
MSTRG.4980.1	433.852	466.643	401.061	0.859461	-0.218495	0.876369	1
MSTRG.1176.1	15.5014	20.3576	10.6453	0.522916	-0.935349	0.876678	1
MSTRG.2894.1	38.5572	32.0569	45.0575	1.40555	0.491133	0.877387	1
MSTRG.11426.1	873.146	933.699	812.592	0.870293	-0.200426	0.877957	1
MSTRG.12893.1	39.6264	33.4054	45.8474	1.37246	0.456759	0.878416	1
MSTRG.16203.1	87.6605	98.2356	77.0854	0.784699	-0.349789	0.878524	1
MSTRG.5498.1	1905.08	2031.01	1779.16	0.875997	-0.191001	0.881841	1
MSTRG.10941.1	6.46054	3.00582	9.91527	3.29869	1.72189	0.882331	1
MSTRG.7818.1	335.481	361.609	309.352	0.855488	-0.225181	0.883548	1
MSTRG.10131.1	180.432	196.674	164.19	0.834832	-0.260442	0.883861	1
MSTRG.13824.1	528.119	491.822	564.416	1.1476	0.198624	0.884933	1
MSTRG.13527.1	395.57	424.664	366.477	0.86298	-0.2126	0.885072	1
MSTRG.3032.1	389.716	418.43	361.002	0.862754	-0.212979	0.886346	1
MSTRG.13661.1	25.8737	31.3656	20.3819	0.649818	-0.621893	0.886512	1
MSTRG.12854.2	105.696	95.8945	115.496	1.20441	0.268328	0.886606	1
MSTRG.6053.6	1177.12	1252.78	1101.46	0.879214	-0.185713	0.886739	1
MSTRG.15661.6	66.2091	58.8316	73.5866	1.2508	0.322852	0.887208	1
MSTRG.12565.1	361.56	334.616	388.504	1.16105	0.215426	0.887328	1
MSTRG.4572.1	16.1964	12.1248	20.268	1.67162	0.741249	0.890352	1
MSTRG.6748.1	91.4652	101.508	81.4227	0.802133	-0.318087	0.891153	1
MSTRG.2350.1	220.994	205.966	236.021	1.14592	0.19651	0.891439	1
MSTRG.5958.2	1030.02	972.533	1087.5	1.11821	0.161196	0.892624	1
MSTRG.3560.3	132.85	122.266	143.434	1.17313	0.230366	0.893338	1
MSTRG.9609.4	64.2519	57.2143	71.2895	1.24601	0.317315	0.893364	1
MSTRG.19283.1	203.694	219.925	187.462	0.852392	-0.23041	0.894792	1
MSTRG.16006.4	3.54655	6.24773	0.845371	0.135309	-2.88567	0.895471	1
MSTRG.7145.1	97.6869	88.9817	106.392	1.19566	0.257812	0.895923	1
MSTRG.20183.1	148.771	161.457	136.086	0.842863	-0.246629	0.89824	1
MSTRG.6777.22	91.4158	100.257	82.5749	0.823634	-0.279925	0.89856	1
MSTRG.6736.1	34.9753	40.6764	29.2741	0.719683	-0.474567	0.899846	1
MSTRG.14079.1	442.898	417.942	467.854	1.11942	0.162758	0.900927	1
MSTRG.10461.2	131.362	141.831	120.893	0.852372	-0.230446	0.900954	1
MSTRG.11269.1	627.664	665.947	589.381	0.885026	-0.176208	0.901025	1
MSTRG.12854.1	67.0129	74.4974	59.5285	0.799068	-0.323609	0.901153	1
MSTRG.2232.2	486.898	517.681	456.114	0.881073	-0.182667	0.902821	1
MSTRG.13014.1	190.688	177.804	203.572	1.14492	0.195248	0.903831	1
MSTRG.20489.1	367.32	390.431	344.209	0.881614	-0.181781	0.903988	1
MSTRG.4878.1	26.3669	31.0764	21.6574	0.696907	-0.520961	0.904848	1
MSTRG.2091.1	111.133	102.776	119.49	1.16262	0.217376	0.905288	1
MSTRG.19887.1	200.577	214.925	186.229	0.866483	-0.206757	0.906947	1
MSTRG.10810.1	58.9595	53.0637	64.8553	1.22221	0.289498	0.90751	1
MSTRG.9077.1	1796.75	1713.35	1880.14	1.09735	0.134023	0.907935	1
MSTRG.19935.1	1625.63	1710.06	1541.21	0.901262	-0.149981	0.908601	1
MSTRG.6342.1	224.626	240.055	209.198	0.87146	-0.198493	0.909585	1
MSTRG.3602.1	23.4312	19.6715	27.1909	1.38225	0.467018	0.910084	1
MSTRG.4490.1	201.772	215.208	188.336	0.875135	-0.192422	0.910218	1
MSTRG.7162.1	4.74652	2.20743	7.28561	3.3005	1.72268	0.911794	1
MSTRG.13346.1	44.2561	39.6501	48.8621	1.23233	0.301392	0.912919	1
MSTRG.6863.1	166.981	157.164	176.799	1.12494	0.169842	0.914246	1
MSTRG.12237.1	93.8386	101.783	85.8945	0.843901	-0.244855	0.914971	1
MSTRG.8202.4	228.571	216.639	240.504	1.11016	0.150768	0.916863	1
MSTRG.16306.1	107.966	116.302	99.6298	0.856647	-0.223228	0.917227	1
MSTRG.12158.2	11.7003	14.7786	8.62197	0.583409	-0.77742	0.918672	1
MSTRG.263.1	189.766	202.166	177.366	0.877327	-0.188813	0.919662	1
MSTRG.6775.1	2.3603	0.485325	4.23527	8.72667	3.12543	0.919824	1
MSTRG.14372.1	421.104	441.845	400.362	0.906114	-0.142235	0.92017	1
MSTRG.12964.1	181.094	192.127	170.061	0.885148	-0.17601	0.921183	1
MSTRG.6852.1	35.1059	39.5108	30.701	0.777029	-0.36396	0.922686	1
MSTRG.10755.1	134.583	126.7	142.467	1.12444	0.169212	0.922831	1
MSTRG.9026.1	329.247	314.791	343.703	1.09184	0.126767	0.923308	1
MSTRG.13182.6	233.843	222.021	245.664	1.10649	0.14599	0.924111	1
MSTRG.16108.1	531.335	556.02	506.65	0.911208	-0.134148	0.924898	1
MSTRG.20272.1	159.144	150.678	167.609	1.11237	0.153631	0.925281	1
MSTRG.4980.2	6.21424	3.98473	8.44376	2.11903	1.0834	0.926859	1
MSTRG.9065.1	368.757	386.818	350.696	0.906617	-0.141434	0.927545	1
MSTRG.12174.1	53.9668	59.205	48.7285	0.823046	-0.280955	0.927638	1
MSTRG.17681.2	4.28542	2.22019	6.35064	2.8604	1.51622	0.928352	1
MSTRG.6453.2	102.126	109.515	94.7367	0.865055	-0.209136	0.928496	1
MSTRG.4773.1	153.919	146.346	161.492	1.10349	0.142079	0.928572	1
MSTRG.882.1	8.27325	5.93385	10.6126	1.78849	0.838744	0.928623	1
MSTRG.802.1	556.933	582.257	531.61	0.913016	-0.131288	0.929622	1
MSTRG.15782.2	63.7584	68.6755	58.8413	0.856801	-0.222967	0.930694	1
MSTRG.10134.1	9.82931	12.3923	7.2663	0.586355	-0.770154	0.931143	1
MSTRG.11564.1	985.048	951.694	1018.4	1.07009	0.0977371	0.931678	1
MSTRG.6585.1	26.8852	23.7326	30.0378	1.26567	0.339907	0.932879	1
MSTRG.8809.1	454.127	473.398	434.856	0.918583	-0.122518	0.93537	1
MSTRG.18387.1	62.6151	58.4996	66.7307	1.1407	0.189923	0.935854	1
MSTRG.10307.1	36.5203	40.2043	32.8363	0.816736	-0.292058	0.93932	1
MSTRG.492.3	1226.2	1189.49	1262.91	1.06172	0.0864065	0.93948	1
MSTRG.18171.1	137.428	131.625	143.231	1.08818	0.121913	0.940218	1
MSTRG.10167.2	5.87225	3.98473	7.75977	1.94738	0.961534	0.941298	1
MSTRG.5103.11	1188.66	1155.13	1222.19	1.05805	0.0814121	0.942551	1
MSTRG.5960.1	1082.76	1052.09	1113.42	1.0583	0.0817465	0.94256	1
MSTRG.940.1	65.7109	70.1639	61.258	0.87307	-0.19583	0.944165	1
MSTRG.13684.4	45.904	42.9766	48.8314	1.13623	0.184257	0.945851	1
MSTRG.14573.2	365.833	355.825	375.842	1.05625	0.0789571	0.945963	1
MSTRG.18180.1	76.5006	72.8531	80.1481	1.10013	0.137678	0.946495	1
MSTRG.15831.1	42.9327	46.2044	39.6611	0.858383	-0.220306	0.946686	1
MSTRG.10338.1	12.5235	10.5831	14.4638	1.36669	0.450684	0.947142	1
MSTRG.17797.1	10.434	8.56421	12.3039	1.43666	0.522721	0.947245	1
MSTRG.18754.1	83.7794	80.0181	87.5408	1.09401	0.129629	0.947606	1
MSTRG.19372.1	14.6097	16.8587	12.3608	0.7332	-0.447722	0.948336	1
MSTRG.11556.3	6006.21	6181.87	5830.54	0.943168	-0.084414	0.9488	1
MSTRG.19099.3	1.21331	2.42662	0	0	-Inf	0.949554	1
MSTRG.3813.1	46.8769	50.4242	43.3296	0.859301	-0.218765	0.950047	1
MSTRG.10753.3	46.3738	49.8308	42.9168	0.86125	-0.215496	0.950606	1
MSTRG.13684.1	74.9206	71.4754	78.3659	1.0964	0.132777	0.950935	1
MSTRG.15828.1	243.235	252.429	234.042	0.927163	-0.109105	0.95162	1
MSTRG.15237.2	2.27022	3.67823	0.862197	0.234405	-2.09292	0.952262	1
MSTRG.6201.1	235.79	229.498	242.082	1.05483	0.0770171	0.953613	1
MSTRG.12076.1	222.132	230.439	213.826	0.927908	-0.107947	0.954564	1
MSTRG.7643.1	2436.02	2385.81	2486.23	1.04209	0.0594763	0.956496	1
MSTRG.12236.1	205.858	200.178	211.538	1.05675	0.0796329	0.956661	1
MSTRG.2604.1	320.885	330.359	311.411	0.942645	-0.0852136	0.959252	1
MSTRG.14732.1	13.3784	11.9014	14.8553	1.2482	0.319846	0.959287	1
MSTRG.15528.2	2075.16	2036.17	2114.14	1.0383	0.0542175	0.959841	1
MSTRG.2025.2	8.00216	6.65132	9.353	1.40619	0.491787	0.960743	1
MSTRG.19725.1	418.181	409.395	426.968	1.04292	0.0606333	0.960962	1
MSTRG.12936.9	0.845371	0	1.69074	Inf	Inf	0.961751	1
MSTRG.5980.9	0.844376	0	1.68875	Inf	Inf	0.961786	1
MSTRG.15834.1	3.42932	4.7477	2.11094	0.444624	-1.16934	0.961925	1
MSTRG.17481.1	179.263	175.723	182.804	1.0403	0.0569957	0.962056	1
MSTRG.13684.2	4.27002	5.58124	2.9588	0.530133	-0.915573	0.962701	1
MSTRG.17876.1	17.922	19.7885	16.0556	0.811361	-0.301585	0.96396	1
MSTRG.2026.1	52281	51513.3	53048.8	1.02981	0.0423741	0.965211	1
MSTRG.19011.1	58.5505	61.3972	55.7038	0.907269	-0.140398	0.965749	1
MSTRG.4073.1	37.4503	35.9068	38.9939	1.08597	0.118989	0.966234	1
MSTRG.5129.1	279.451	273.978	284.924	1.03995	0.056515	0.966272	1
MSTRG.13314.15	484.392	475.339	493.445	1.03809	0.053932	0.968546	1
MSTRG.14471.1	0.871659	1.74332	0	0	-Inf	0.969471	1
MSTRG.7161.1	440.126	449.201	431.051	0.959594	-0.0595032	0.971169	1
MSTRG.10078.1	299.963	306.727	293.198	0.955894	-0.0650779	0.971491	1
MSTRG.16803.1	240.347	246.257	234.436	0.951995	-0.0709735	0.972031	1
MSTRG.14845.1	61.7466	64.2228	59.2703	0.922886	-0.115776	0.973875	1
MSTRG.8118.1	27.7662	26.6677	28.8647	1.08239	0.114216	0.974281	1
MSTRG.13875.1	500.267	509.714	490.821	0.962935	-0.054489	0.974996	1
MSTRG.8174.2	0.637986	0	1.27597	Inf	Inf	0.97519	1
MSTRG.115.13	514.987	523.981	505.993	0.965671	-0.0503965	0.975879	1
MSTRG.17263.1	3.0238	2.23503	3.81258	1.70583	0.770478	0.97612	1
MSTRG.6562.1	47.3283	49.2838	45.3727	0.920641	-0.119289	0.977659	1
MSTRG.12425.1	19.6448	20.9875	18.3021	0.87205	-0.197517	0.977849	1
MSTRG.7017.1	425.645	433.281	418.01	0.964755	-0.0517661	0.978417	1
MSTRG.16420.2	2.69259	1.98886	3.39632	1.70767	0.772031	0.979287	1
MSTRG.315.1	41.2037	42.7855	39.6219	0.926059	-0.110824	0.979545	1
MSTRG.4887.1	861.236	853.475	868.997	1.01819	0.0260014	0.979594	1
MSTRG.18390.1	143.83	147.093	140.567	0.955636	-0.0654669	0.980564	1
MSTRG.5118.2	0.613039	1.22608	0	0	-Inf	0.982974	1
MSTRG.1939.2	1017.92	1033.39	1002.46	0.970069	-0.0438403	0.983222	1
MSTRG.3560.10	189.417	187.567	191.266	1.01973	0.0281806	0.983538	1
MSTRG.8577.1	37.5054	36.8004	38.2103	1.03831	0.0542389	0.983702	1
MSTRG.13033.1	33.0048	32.2211	33.7885	1.04864	0.0685258	0.985896	1
MSTRG.8463.1	186.168	189.041	183.296	0.969613	-0.0445194	0.986412	1
MSTRG.5913.1	0.431099	0	0.862197	Inf	Inf	0.987551	1
MSTRG.11793.1	103.063	105.104	101.022	0.96116	-0.0571513	0.98823	1
MSTRG.13606.2	0.498091	0.996182	0	0	-Inf	0.988524	1
MSTRG.9968.1	1510.02	1505.33	1514.7	1.00623	0.0089559	0.988777	1
MSTRG.12076.2	1.74808	2.22019	1.27597	0.574712	-0.79909	0.990458	1
MSTRG.4276.1	1712.29	1725.89	1698.69	0.984243	-0.0229136	0.990657	1
MSTRG.14936.1	31.2063	30.9329	31.4796	1.01767	0.0252738	0.992448	1
MSTRG.20130.1	127.721	127.616	127.827	1.00166	0.00238569	0.992485	1
MSTRG.16540.1	303.28	306.419	300.14	0.979511	-0.029867	0.992501	1
MSTRG.485.1	32.5698	32.43	32.7095	1.00862	0.0123831	0.992642	1
MSTRG.17348.1	95.0857	94.7007	95.4708	1.00813	0.0116833	0.992953	1
MSTRG.14556.1	504.533	508.626	500.44	0.983905	-0.0234085	0.99304	1
MSTRG.13334.1	0.374288	0.748576	0	0	-Inf	0.993877	1
MSTRG.263.2	62.5277	63.2465	61.8089	0.977269	-0.0331725	0.995276	1
MSTRG.19099.2	1754.84	1764.48	1745.2	0.98907	-0.0158561	0.995907	1
MSTRG.7134.1	2.73611	2.49909	2.97314	1.18969	0.250583	0.996256	1
MSTRG.1647.5	138.918	140.463	137.372	0.977989	-0.0321101	0.997823	1
MSTRG.32.1	0.211094	0	0.422188	Inf	Inf	0.998203	1
MSTRG.580.4	34.6029	35.158	34.0479	0.968425	-0.0462885	0.99833	1
MSTRG.18372.1	472.508	475.122	469.894	0.988997	-0.0159621	0.99853	1
MSTRG.3259.4	0.242662	0.485325	0	0	-Inf	0.998604	1
MSTRG.18172.1	0.242662	0.485325	0	0	-Inf	0.998604	1
MSTRG.14737.1	3.26224	3.50679	3.01769	0.860528	-0.216705	0.998933	1
MSTRG.7097.1	2.39092	2.24573	2.53611	1.12931	0.175437	0.999529	1
MSTRG.13724.1	0.673761	0.485325	0.862197	1.77654	0.829067	0.999662	1
MSTRG.3337.1	178.393	179.151	177.634	0.991534	-0.0122657	1	1
MSTRG.5041.1	0.125242	0.250485	0	0	-Inf	1	1
MSTRG.2037.1	0.125242	0.250485	0	0	-Inf	1	1
MSTRG.8573.2	0.461108	0.49953	0.422686	0.846166	-0.240987	1	1
MSTRG.18057.4	0.457668	0.493147	0.422188	0.856109	-0.224133	1	1
MSTRG.2350.2	0.586101	0.750015	0.422188	0.562906	-0.829034	1	1
MSTRG.4490.2	0.465314	0.49953	0.431099	0.863008	-0.212554	1	1
MSTRG.14395.2	0.121331	0.242662	0	0	-Inf	1	1
MSTRG.15813.2	0.332425	0.242662	0.422188	1.73982	0.798934	1	1
